# Supplementary material for: Association of Parkinson’s disease and treatment with aminosalicylates in inflammatory bowel disease: a cross-sectional study in a Spain drug dispensation records
Source: PubMed Central journal article supplement — BMJ Open. 2019 Jun 19;9(6):e025574. doi: 10.1136/bmjopen-2018-025574 (PMC6588996; doi:10.1136/bmjopen-2018-025574), 2019-06-19
Supplement: bmjopen-2018-025574.draft_revisions.pdf [file bmjopen-2018-025574.draft_revisions.pdf]

# BMJ Open

BMJ Open is committed to open peer review. As part of this commitment we make the peer review history of every article we publish publicly available.

When an article is published we post the peer reviewers' comments and the authors' responses online. We also post the versions of the paper that were used during peer review. These are the versions that the peer review comments apply to.

The versions of the paper that follow are the versions that were submitted during the peer review process. They are not the versions of record or the final published versions. They should not be cited or distributed as the published version of this manuscript.

BMJ Open is an open access journal and the full, final, typeset and author-corrected version of record of the manuscript is available on our site with no access controls, subscription charges or pay-per-view fees (<http://bmjopen.bmj.com>).

If you have any questions on BMJ Open's open peer review process please email [info.bmjopen@bmj.com](mailto:info.bmjopen@bmj.com)

# BMJ Open

## ASSOCIATION OF PARKINSON'S DISEASE AND TREATMENT WITH AMINOSALICYLATES IN INFLAMMATORY BOWEL DISEASE: A CROSS-SECTIONAL STUDY

|                               |                                                                                                                                                                                                                                                                                                                                                                                                                                                                                                                                                                                                                                                                                                                                                                                                                                                                                                                                                        |
|-------------------------------|--------------------------------------------------------------------------------------------------------------------------------------------------------------------------------------------------------------------------------------------------------------------------------------------------------------------------------------------------------------------------------------------------------------------------------------------------------------------------------------------------------------------------------------------------------------------------------------------------------------------------------------------------------------------------------------------------------------------------------------------------------------------------------------------------------------------------------------------------------------------------------------------------------------------------------------------------------|
| Journal:                      | <i>BMJ Open</i>                                                                                                                                                                                                                                                                                                                                                                                                                                                                                                                                                                                                                                                                                                                                                                                                                                                                                                                                        |
| Manuscript ID                 | bmjopen-2018-025574                                                                                                                                                                                                                                                                                                                                                                                                                                                                                                                                                                                                                                                                                                                                                                                                                                                                                                                                    |
| Article Type:                 | Research                                                                                                                                                                                                                                                                                                                                                                                                                                                                                                                                                                                                                                                                                                                                                                                                                                                                                                                                               |
| Date Submitted by the Author: | 22-Jul-2018                                                                                                                                                                                                                                                                                                                                                                                                                                                                                                                                                                                                                                                                                                                                                                                                                                                                                                                                            |
| Complete List of Authors:     | Pinel Ríos, Javier; Hospital Vithas Xanit Internacional, Neuroscience unit Madrid Navarro, Carlos; University Hospitals of Granada, Institute of Bio-health Research ibs, Department of Neurology<br>Pérez Navarro, María; University Hospitals of Granada, Institute of Bio-health Research ibs, Department of Neurology<br>Cabello Tapia, María; University Hospitals of Granada, Department of Digestive Diseases<br>Piña Vera, María ; Andalusian Health Service Pharmacy and Benefit Support Department<br>Campos Arillo, Víctor; Hospital Vithas Xanit Internacional, Neuroscience unit<br>Gómez García, María; University Hospitals of Granada, Department of Digestive Diseases<br>Mínguez Castellanos, Adolfo; University Hospitals of Granada, Institute of Bio-health Research ibs, Department of Neurology<br>Escamilla Sevilla, Francisco; University Hospitals of Granada, Institute of Bio-health Research ibs, Department of Neurology |
| Keywords:                     | 5-ASA, Parkinson's disease, Inflammatory bowel disease < GASTROENTEROLOGY, alpha-synuclein, microbiota, prevalence                                                                                                                                                                                                                                                                                                                                                                                                                                                                                                                                                                                                                                                                                                                                                                                                                                     |
|                               |                                                                                                                                                                                                                                                                                                                                                                                                                                                                                                                                                                                                                                                                                                                                                                                                                                                                                                                                                        |

SCHOLARONE™  
Manuscripts

1  
2  
3 **ASSOCIATION OF PARKINSON'S DISEASE AND**  
4 **TREATMENT WITH AMINOSALICYLATES IN**  
5 **INFLAMMATORY BOWEL DISEASE:**  
6 **A CROSS-SECTIONAL STUDY**  
7  
8  
9

10 Javier Pinel-Ríos<sup>1</sup>, MD; Carlos Javier Madrid-Navarro<sup>2</sup>, MD; María José Pérez-  
11 Navarro<sup>2</sup>, MD; María José Cabello-Tapia<sup>3</sup>, MD; María José Piña-Vera<sup>4</sup>; Víctor  
12 Campos-Arillo<sup>1</sup>, MD, PhD; María Rosario Gómez-García<sup>3</sup>, MD; Adolfo Mínguez-  
13 Castellanos<sup>2</sup>, MD, PhD; Francisco Escamilla-Sevilla<sup>2</sup>, MD, PhD.  
14  
15  
16  
17

18 1: Department of Neurology, Vithas Xanit International Hospital, Benalmadena,  
19 Malaga, Spain.

20 2: Department of Neurology, University Hospitals of Granada, Institute of Bio-health  
21 Research ibs. Granada, Spain.  
22

23 3: Department of Digestive Diseases, University Hospitals of Granada, Granada, Spain.  
24

25 4: Andalusian Health Service Pharmacy and Benefit Support Department. Spain.  
26  
27  
28

29  
30 **Correspondence:**

31 *Dr. Javier Pinel-Ríos, MD*

32 Unidad de Neurociencias, Av. de los Argonautas, s/n, 29631 Benalmadena, Malaga,  
33 Spain. Email: javierpinelr@gmail.com. Tel: +34652885523. Fax: +34952367197  
34

35 *Dr. Francisco Escamilla-Sevilla, MD PhD.*

36 Email: fescamilla@hotmail.com  
37  
38  
39  
40

41 **Running Title:** Parkinson's disease and inflammatory bowel disease  
42  
43

44 **Word Count:** 2062  
45  
46

47 **Key words:** 5-ASA, Parkinson's disease, inflammatory bowel disease, alpha-synuclein,  
48 microbiota, prevalence.  
49

50 **Language style:** British English  
51  
52

53  
54  
55 **Abstract**  
56  
57  
58  
59  
60

1  
2  
3  
4 **Objectives:** To analyze the association between aminosalicylate-treated inflammatory  
5  
6  
7  
8  
9  
10  
11  
12  
13  
14  
15  
16  
17  
18  
19  
20  
21  
22  
23  
24  
25  
26  
27  
28  
29  
30  
31  
32  
33  
34  
35  
36  
37  
38  
39  
40  
41  
42  
43  
44  
45  
46  
47  
48  
49  
50  
51  
52  
53  
54  
55  
56  
57  
58  
59  
60

**Objectives:** To analyze the association between aminosalicylate-treated inflammatory bowel disease (IBD) and Parkinson's disease (PD) at population level.

**Design:** Cross-sectional study.

**Setting:** The study was performed based on electronic drug prescription and dispensation records of the Andalusian Public Health System.

**Participants:** All individuals aged  $\geq 50$  yrs with at least one drug dispensation during December 2014 were identified from the records.

**Primary and secondary outcome measures:** Three groups were formed: "Possible PD" group, including all who received an anti-Parkinson agent; "Possible IBD" group, those treated with mesalazine and/or derivatives (5-aminosalicylic acid [ASA]); and "Possible PD and IBD", including those receiving both anti-Parkinson agent and 5-ASA. Prevalence of "Possible PD" was determined among those with "Possible IBD" and among those without this condition. The age- and sex-adjusted OR was calculated.

**Results:** We recorded 2,020,868 individuals (68 $\pm$ 11 yrs., 56 % female), 19,966 were included in "Possible PD" group (75 $\pm$ 9 yrs., 53 % female) and 7,485 in "Possible IBD" group (64 $\pm$ 10 yrs., 47 % female); only 56 were included in both groups (76 $\pm$ 8 yrs., 32 % female). The prevalence of "Possible PD" was 0.7% among those with "Possible IBD" and 1 % among those without this condition (OR=0.75; 95 % CI=0.57-0.98; p=0.036). The age- and sex-adjusted OR was 0.28 in individuals aged  $\leq 65$  years (95 % CI=0.10-0.74; p=0.01) and 1.17 in older individuals (95 % CI=0.89-1.54; p=0.257).

**Conclusions:** Within the limitations of this study, the results suggest a protective role for IBD and/or 5-ASA against PD development, especially among under 65-year-olds. Further studies are warranted to explore this association given its scientific and therapeutic implications.

1  
2  
3 **Article Summary: Strengths and limitations of this study**

4 - This study provides evidence for a better understanding on the association  
5  
6 of inflammatory bowel disease and Parkinson's disease.  
7

8  
9 - Parkinson's disease and inflammatory bowel disease share some etiopathogenic  
10  
11 features at the enteric level.  
12

13 - This cross-sectional study explore associations between PD and IBD treated with  
14  
15 mesalazine (5-aminosalicylic acid) or its derivative sulfasalazine.  
16

17 - Matching by age and sex was performed.  
18

19  
20 - This study has limitations related to the utilization of a drug dispensation record,  
21  
22 subjects therefore not be considered representative of the general population, and there  
23  
24 is also a potential classification error related to the selection of proxy variables.  
25  
26  
27  
28  
29  
30  
31  
32  
33  
34  
35  
36  
37  
38  
39  
40  
41  
42  
43  
44  
45  
46  
47  
48  
49  
50  
51  
52  
53  
54  
55  
56  
57  
58  
59  
60

## Introduction

Parkinson's disease (PD) is a multisystemic process with early involvement of the peripheral autonomic nervous system and subsequent propagation to the central nervous system [1]. After reports of deposits of alpha-synuclein aggregates that form neurites or Lewy bodies in gastric submucosal and myenteric plexi [1], various clinical and experimental studies described the enteric nervous system as fundamental in the etiopathogenesis of PD [1-5]. Braak's "dual-hit" hypothesis has been endorsed by evidence of the centripetal trans-synaptic and axonal migration of alpha-synuclein aggregates from neurons of the digestive system to brainstem structures such as the dorsal nucleus of the vagus nerve (Braak stage 2) [1-3]. It has been reported that certain components of the microbiota of PD patients can produce rupture of the intestinal barrier and bacterial translocation, which may be responsible for an intestinal proinflammatory status and subsequent alpha-synuclein aggregation and propagation [6,7].

Some features of inflammatory bowel disease (IBD) are similar to those of PD. Thus, their etiopathogenesis involves an anomalous immune response to specific microbiota that would trigger intestinal inflammatory activity in predisposed individuals unable to inhibit this inflammation and without the immunological tolerance characteristic of a healthy intestine [8]. The few studies on the relationship between these diseases have not considered IBD treatment and have published controversial results, with observations either of no association [9] or of an increased risk of PD only among patients with Crohn's disease [10], attributable to a genetic relationship between these diseases at different *loci*, as revealed in a genome-wide association study [11].

1  
2  
3 With this background, the objective of this study was to explore associations between  
4  
5 PD and IBD treated with mesalazine (5-aminosalicylic acid) or its derivative  
6  
7 sulfasalazine, hereafter 5-ASA.  
8  
9  
10  
11  
12  
13  
14  
15  
16  
17  
18  
19  
20  
21  
22  
23  
24  
25  
26  
27  
28  
29  
30  
31  
32  
33  
34  
35  
36  
37  
38  
39  
40  
41  
42  
43  
44  
45  
46  
47  
48  
49  
50  
51  
52  
53  
54  
55  
56  
57  
58  
59  
60

## Material and methods

A cross-sectional study was performed based on electronic drug prescription and dispensation records (*Receta XXI*) of the Andalusian Public Health System, which include 98 % of all prescriptions in the region. Andalusia is located in southern Spain and is the most populated autonomous community in the country, with 8,402,000 inhabitants. The study was approved by the Research Ethics Committee of Granada (CEI-GRANADA).

## Subjects

All individuals aged  $\geq 50$  yrs with at least one drug dispensation during December 2014 were identified from the records. Three groups were formed: “Possible PD” group, including all who received an anti-Parkinson agent, such as levodopa in different formulations and/or dopaminergic agonist, excluding those only receiving a single low-dose dopaminergic agonist (ropinirole  $\leq 1$  mg; rotigotine  $\leq 2$  mg; pramipexole  $\leq 0.26$  mg; pergolide  $\leq 1$  mg; cabergoline  $\leq 1$  mg) and/or monoamine oxidase B inhibitor, including those exclusively treated with selegiline or rasagiline; “Possible IBD” group, including all receiving 5-ASA in its different formulations (mesalazine/mesalamine or 5-aminosalicylic acid and sulfasalazine); and “Possible PD and IBD”, including those receiving both anti-Parkinson agent and 5-ASA.

## Study variables

Membership of the “Possible PD” group was the dependent variable, and membership of the “Possible IBD” group, sex, and age were the predictive variables.

## Data gathering

Data were obtained from the computerized databases of the Andalusian Health Service Pharmacy and Benefit Support Department. Anonymity was preserved by masking clinical record numbers.



### ***Data analysis***

In a descriptive analysis, central tendency and dispersion measurements were calculated for quantitative variables and absolute and relative frequencies for qualitative variables, plotting the corresponding graphs. After applying the Kolmogorov-Smirnov test to check data distribution normality, between-group comparisons were evaluated with the Mann-Whitney U for the quantitative variable (age) and with the chi-square test for categorical variables. After controlling for age and sex, the strength of between-group associations was established by constructing a multiple logistic regression model to estimate the odds ratio (OR) and 95 % confidence interval. All tests were two-tailed, and  $p < 0.05$  was considered significant. R and SPSS 21 statistical packages were used for the statistical analysis.

## Results

During December 2014, 2,020,868 individuals aged  $\geq 50$  yrs were dispensed with at least one drug; their mean age was  $67.9 \pm 11.8$  yrs., 56 % were female (mean of  $68.6 \pm 11.5$  yrs) and 44 % were male (mean of  $67.2 \pm 10.7$  yrs.). The study included 27,451 patients (mean age of  $72.3 \pm 10.9$  yrs.; 51 % female) with at least one dispensation of anti-Parkinson agent (“Possible PD”) and/or 5-ASA (“Possible IBD”) after excluding 24 patients with inadequate records (e.g., missing data on age and/or sex) and 6 with unlikely PD (low-dose dopaminergic agonist [0.5 mg cabergoline in 1 case and 0.5 mg ropinirole in 5]); the mean age was slightly higher for the females than for the males ( $73.1 \pm 10.9$  vs.  $71.4 \pm 10.8$  yrs.;  $p=0.0001$ )

A total of 19,966 individuals were considered as “Possible PD” (mean age of  $75.4 \pm 9.3$  yrs.; 53 % females) and 7,485 as “Possible IBD” ( $64.15 \pm 10.4$  yrs.; 47 % females).

Individuals with “Possible PD” were older ( $p=0.0001$ ) and more frequently female ( $p=0.0001$ ) in comparison to those with “Possible IBD” (figure 1). A group of 56 individuals (32 females) were considered both “Possible PD” and “Possible IBD”; their mean age was  $75.7 \pm 8.1$  yrs (range, 52-94 yrs), and they showed no differences in age ( $p=0.956$ ) or sex ( $p=0.505$ ) distribution with respect to the “Possible PD” group.

The prevalence of “Possible PD” was 0.7 % in the “Possible IBD” group and 1 % in those without this condition. The OR for an individual with “Possible PD” being in the “Possible IBD” group was 0.75 (95 % CI=0.57-0.98;  $p=0.036$ ), rising to 0.94 (95 % CI=0.72-1.23;  $p=0.657$ ) after controlling for age and sex; stratification by age yielded an OR of 0.28 (95 % CI=0.10-0.74;  $p=0.01$ ) for individuals aged  $\leq 65$  years and 1.17 (95 % CI =0.89-1.54;  $p=0.257$ ) for those aged  $> 65$  years, after controlling for sex (Table 1).

## Discussion

The results of this cross-sectional study suggest that the presence of IBD and/or treatment with 5-ASA may play a protective role against PD development, especially among under-65-year-olds. The pathogenesis of the two diseases may share certain features, including the role of enteric glial cells [12-14] and inflammation [15], genetic factors (PD and Crohn's disease) [11], the protective effect of tobacco (PD and ulcerous colitis) [16], the presence of proinflammatory flora, and altered permeability with rupture of the intestinal barrier [6,7]. In fact, the inflammatory condition and/or treatment with 5-ASA might have been expected to act as a risk rather than protective factor, unless they have some impact on the pathogenesis of this synucleinopathy. Our results are similar to those of the recent case-control study of PD risk based on Medicare data; this group found an inverse association between IBD and PD, including both Crohn's disease and ulcerous colitis. Similarly, there was an inverse association between PD and IBD-associated conditions, as well as IBD associated surgical procedures and immunosuppressant use, even among beneficiaries without IBD. The authors suggest that IBD is associated with a lower risk of developing PD in the adjusted model for a population aged > 65 years (OR = 0.86; 95% CI=0.81-0.92) [17]. Conversely, a retrospective cohort study based on healthcare records found an increased risk of PD among IBD patients, especially those with Crohn's disease, given that this association was not observed in the subgroup with ulcerous colitis (OR = 0.94; 95 % CI=0.49-1.84) [10]. Although these cases were not specified in the present study, they can largely be considered to have ulcerous colitis, given reservations in clinical guidelines about the administration of 5-ASA in Crohn's disease [18]. In the aforementioned cohort study, there was a relative reduction in PD risk among patients

1  
2  
3 with longer follow-up times, similar to observations in individuals with truncal  
4  
5 vagotomy [19,20] and in under 65year-olds, as in the present study.

6  
7 Recently two studies have been published describing a risk association between IBD  
8  
9 and PD. In the Danish nationwide population cohort study, covering the period 1977-  
10  
11 2014, found a significantly increased risk of PD when comparing patients with IBD  
12  
13 with non-IBD (HR=1.22; 95% CI=1.09-1.35), especially among patients with ulcerative  
14  
15 colitis (HR=1.35; 95% CI=1.20-1.52). However, in those patients diagnosed with IBD  
16  
17 under 40 years of age and with prolonged follow-up > 20 years, this increase was not  
18  
19 statistically significant [21], suggesting, as we have previously referred, that IBD  
20  
21 treatment may lessen the risk of PD. In a retrospective cohort study, based on the  
22  
23 Market-Scan Commercial and Medicare databases, a higher incidence of PD was  
24  
25 observed among patients with IBD than among individuals without IBD; the authors  
26  
27 found a statistically significant 28% increase in the incidence of PD among patients  
28  
29 with IBD compared with the unaffected matched controls. Conversely, they observed a  
30  
31 markedly lower PD incidence rate (0.08 per 1000 patient-years) among patients with  
32  
33 IBD who were exposed to anti-TNF therapy compared with patients without exposure  
34  
35 (0.76 per 1000 patient-years), which means a 78% reduction in the PD incidence rate  
36  
37 [22], a risk reduction in the same range as that found in our patients treated with 5-ASA.  
38  
39 Despite the contradictory associations between both processes, two studies find a  
40  
41 reduction in the risk of PD related to the use of immunomodulators [17,22], although  
42  
43 they do not describe the degree of exposure to 5-ASA. It is presumable that those with a  
44  
45 more active disease and therefore candidates for immunomodulators therapies will have  
46  
47 had a greater exposure to 5-ASA, but it is also possible that those treated exclusively  
48  
49 with 5-ASA have a more benign inflammatory disease.  
50  
51  
52  
53  
54  
55  
56  
57  
58  
59  
60

1  
2  
3 5-ASA drugs are the first-line treatment in ulcerous colitis [18,23]. Their action  
4  
5 mechanism is not fully elucidated but is considered to include: a) anti-inflammatory  
6  
7 activity or inhibition of the local synthesis of prostaglandins and leukotrienes [24]; b)  
8  
9 reduction in nitric oxide and IL-6 production and an antiapoptotic effect, diminishing  
10  
11 phosphorylation by mitogen-activated protein kinases (MAPKs), e.g., p38 and JNK (c-  
12  
13 Jun N-terminal kinases) [25]; and c) action on the microbiota, producing qualitative and  
14  
15 quantitative changes in its composition [26].  
16

17  
18 In PD, alpha-synuclein aggregates are known to be present in the intestine some years  
19  
20 before the onset of motor symptoms [4,5], especially in certain structures such as the  
21  
22 vermiform appendix [27]. Local action mechanisms of 5-ASA described above may  
23  
24 affect progression of the synucleinopathy, given that they may act on etiopathogenetic  
25  
26 mechanisms that would activate microglia, associated with certain microbiota and  
27  
28 bacterial membrane lipopolysaccharides or endogenous factors (e.g., JNK and p38)  
29  
30 [28,29,30].  
31

32  
33 In a recent murine model with alpha-synuclein overexpression, transplantation from PD  
34  
35 patients of fecal matter with greater short-chain fatty-acid content was followed by  
36  
37 microglial activation, an increase in inflammation mediators (TNF- $\alpha$  and IL-6) and in  
38  
39 alpha-synuclein aggregation and propagation, a poorer execution of motor tests, and  
40  
41 even constipation; these changes were reduced by treatment with minocycline [31],  
42  
43 suggesting that other drug groups, such as 5-ASA, may have a similar effect.  
44

45  
46 This study has limitations related to the utilization of a drug dispensation record,  
47  
48 subjects therefore not be considered representative of the general population. The  
49  
50 resulting ORs may be overestimated, because the prevalence of both diseases was over-  
51  
52 represented but in an unequal manner, being 5-fold higher for PD in the study  
53  
54 population than in the general population but only slightly higher for IBD. Cross-  
55  
56  
57  
58  
59  
60

1  
2  
3 sectional drug dispensation studies are more likely to include patients with PD than with  
4  
5 IBD due to their older age and more frequent polymedication and because some  
6  
7 biological and immunosuppressive therapies received by IBD patients in the hospital are  
8  
9 not included in the dispensary records. Furthermore, individuals treated with 5-ASA are  
10  
11 a subgroup of patients with IBD and ulcerous colitis, mainly in those with active  
12  
13 disease. We did not control for the possibility of a group of patients receiving combined  
14  
15 maintenance therapy (5-ASA and other drugs). There is also a potential classification  
16  
17 error related to the selection of *proxy* variables, given that the diseases under study were  
18  
19 identified according to the medication received. Notably, dopaminergic drugs are  
20  
21 prescribed, although much less frequently, for diseases other than PD (atypical  
22  
23 parkinsonism, chronic adult hydrocephaly, restless legs syndrome, etc.); however, this is  
24  
25 unlikely to have affected the validity of our results given the large sample size.  
26  
27

## 28 **Conclusions**

29  
30 A lower risk of PD was observed in individuals with IBD aged  $\leq 65$  years and treated  
31  
32 with 5-ASA, which may be, as hypothesis, related to a theoretical pharmacological  
33  
34 effect on alpha-synuclein aggregation and propagation that could reduce or delay PD  
35  
36 onset in at-risk populations. The advantages of 5-ASA medication include its relatively  
37  
38 low cost and lack of absorption. Within the limitations of the methodology applied,  
39  
40 further experimental research with animal models and new longitudinal studies are  
41  
42 warranted, given the important scientific and therapeutic implications of these findings.  
43  
44  
45  
46  
47  
48  
49  
50  
51  
52  
53  
54  
55  
56  
57  
58  
59  
60

1  
2  
3 **Acknowledgments:** None

4  
5 **Funding statement:** This research received no specific grant from any funding agency  
6  
7 in the public, commercial or not-for-profit sectors.

8  
9 **Conflict of interest:** The authors declare they have no conflict of interest.

10  
11 **Author Contributions:** JP, FE and VC contributed conception and design of the study;  
12  
13 MPN, MPV and CM organized the database; FE and AM performed the statistical  
14  
15 analysis; JP wrote the first draft of the manuscript; FE, CM, MC and MG wrote sections  
16  
17 of the manuscript. All authors contributed to manuscript revision, read and approved the  
18  
19 submitted version.  
20  
21  
22  
23  
24  
25  
26  
27  
28  
29  
30  
31  
32  
33  
34  
35  
36  
37  
38  
39  
40  
41  
42  
43  
44  
45  
46  
47  
48  
49  
50  
51  
52  
53  
54  
55  
56  
57  
58  
59  
60

## References

1. Braak H, Rüb U, Gai WP, Del Tredici K. Idiopathic Parkinson's disease: possible routes by which vulnerable neuronal types may be subject to neuroinvasion by an unknown pathogen. *J Neural Transm* 2003; 110: 517–36.
2. Pan-Montojo F, Anichtchik O, Dening Y, et al. Progression of Parkinson's disease pathology is reproduced by intragastric administration of rotenone in mice. *PLoS ONE* 2010; 5: e8762.
3. Holmqvist S, Chutna O, Bousset L, et al. Direct evidence of Parkinson pathology spread from the gastrointestinal tract to the brain in rats. *Acta Neuropathol* 2014; 128: 805–20.
4. Hilton D, Stephens M, Kirk L, et al. Accumulation of  $\alpha$ -synuclein in the bowel of patients in the pre-clinical phase of Parkinson's disease. *Acta Neuropathol* 2013; 127: 235–41.
5. Mínguez-Castellanos A, Chamorro CE, Escamilla-Sevilla F, et al. Do alpha-synuclein aggregates in autonomic plexuses predate Lewy body disorders?: a cohort study. *Neurology* 2007; 68: 2012–8.
6. Kelly LP, Carvey PM, Keshavarzian A, et al. Progression of intestinal permeability changes and alpha-synuclein expression in a mouse model of Parkinson's disease. *Mov Disord* 2013; 29: 999–1009.
7. Forsyth CB, Shannon KM, Kordower JH, et al. Increased intestinal permeability correlates with sigmoid mucosa alpha-synuclein staining and endotoxin exposure markers in early Parkinson's Disease. *PLoS ONE* 2011; 6: e28032–10.
8. Sheehan D, Moran C, Shanahan F. The microbiota in inflammatory bowel disease. *J Gastroenterol* 2015; 50 (5): 495-507.



- 1  
2  
3 9. Rugbjerg K, Friis S, Ritz B, Schernhammer ES, Korbo L, Olsen JH.  
4  
5 Autoimmune disease and risk for Parkinson disease: a population-based case-  
6  
7 control study. *Neurology* 2009; 73: 1462–8.  
8
- 9  
10 10. Lin JC, Lin CS, Hsu CW, Lin CL, Kao CH. Association Between Parkinson's  
11  
12 Disease and Inflammatory Bowel Disease: a Nationwide Taiwanese  
13  
14 Retrospective Cohort Study. *Inflamm Bowel Dis* 2016; 22(5): 1049-55.  
15
- 16 11. Nalls MA, Saad M, Noyce AJ, et al. Genetic comorbidities in Parkinson's  
17  
18 disease. *Hum Mol Genet* 2014; 23: 831–41.  
19
- 20 12. Clairembault T, Leclair-Visonneau L, Neunlist M, Derkinderen P. Enteric glial  
21  
22 cells: New players in Parkinson's disease? *Mov Disord* 2015; 30(4):494-8.  
23
- 24 13. Ochoa-Cortes F, Turco F, Linan-Rico A, et al. Enteric Glial Cells: A New  
25  
26 Frontier in Neurogastroenterology and Clinical Target for Inflammatory Bowel  
27  
28 Diseases. *Inflamm Bowel Dis* 2016; 22(2): 433-49.  
29
- 30 14. Capoccia E, Cirillo C, Gigli S, et al. Enteric glia: A new player in inflammatory  
31  
32 bowel diseases. *Int J Immunopathol Pharmacol.* 2015; 28(4): 443-51.  
33
- 34 15. Devos D, Lebouvier T, Lardeux B, et al. Colonic inflammation in Parkinson's  
35  
36 disease. *Neurobiol Dis* 2013; 50: 42–8.  
37
- 38 16. Derkinderen P, Shannon KM, Brundin P. Gut feelings about smoking and coffee  
39  
40 in Parkinson's disease. *Mov Disord* 2014; 29: 976–9.  
41
- 42 17. Camacho-Soto A, Gross A, Nielsen S.S. et al, Inflammatory bowel disease and  
43  
44 risk of Parkinson's disease in Medicare beneficiaries. *Park. Relat. Disord.* 2018  
45  
46 May; 50:23–28.  
47  
48
- 49 18. Mowat C, Cole A, Windsor A, et al. Guidelines for the management of  
50  
51 inflammatory bowel disease in adults. *Gut* 2011; 60: 571-607.  
52  
53  
54  
55  
56  
57  
58  
59  
60

- 1  
2  
3 19. Liu B, Fang F, Pedersen NL, et al. Vagotomy and Parkinson disease: A Swedish  
4  
5 register-based matched-cohort study. *Neurology* 2017; 88(21): 1996-2002.  
6
- 7 20. Svensson E, Horváth-Puhó E, Thomsen RW, et al. Vagotomy and subsequent  
8  
9 risk of Parkinson's disease. *Ann Neurol* 2015; 78(4): 522-9.  
10
- 11 21. Villumsen M, Aznar S, Pakkenberg B, et al. Inflammatory bowel disease  
12  
13 increases the risk of Parkinson's disease: a Danish nationwide cohort  
14  
15 study 1977–2014. *Gut* 2018; 0:1–7.  
16
- 17 22. Peter I, Dubinsky M, Bressman S, et al. Anti-tumor necrosis factor therapy and  
18  
19 incidence of Parkinson disease among patients with inflammatory bowel  
20  
21 disease. *JAMA Neurol*. Published online April 23, 2018.  
22
- 23 23. Ford AC, Achkar JP, Khan KJ, et al. Efficacy of 5-aminosalicylates in ulcerative  
24  
25 colitis: systematic review and meta-analysis. *Am J Gastroenterol* 2011; 106:601.  
26  
27
- 28 24. Greenfield SM, Punchard NA, Teare JP. et al. Review article: The mode of  
29  
30 action of the aminosalicylates in inflammatory bowel disease. *Aliment*  
31  
32 *Pharmacol Ther* 1993; 7: 369-383.  
33
- 34 25. Qu T, Wang E, Jin B, Li W, Liu R, Zhao ZB. 5-Aminosalicylic acid inhibits  
35  
36 inflammatory responses by suppressing JNK and p38 activity in murine  
37  
38 macrophages. *Immunopharmacol Immunotoxicol* 2017; 39(1): 45-53.  
39
- 40 26. Andrews CN, Griffiths TA, Kaufman J, Vergnolle N, Surette MG, Rioux KP.  
41  
42 Mesalazine (5-aminosalicylic acid) alters faecal bacterial profiles, but not  
43  
44 mucosal proteolytic activity in diarrhoea-predominant irritable bowel syndrome.  
45  
46 *Aliment Pharmacol Ther* 2011; 34(3): 374-83.  
47  
48
- 49 27. Gray MT, Munoz DG, Gray DA, Schlossmacher MG, Woulfe JM. Alpha-  
50  
51 synuclein in the appendiceal mucosa of neurologically intact subjects. *Mov*  
52  
53 *Disord* 2013; 29: 991–8.  
54  
55

- 1  
2  
3 28. Zhang W, Gao JH, Yan ZF, et al. Minimally toxic dose of lipopolysaccharide  
4 and  $\alpha$ -synuclein oligomer elicit synergistic dopaminergic neurodegeneration:  
5 role and mechanism of microglial NOX2 activation. *Mol Neurobiol*. 2016 Dec  
6 15. [Epub ahead of print].  
7  
8  
9  
10  
11 29. Moussaud S, Malany S, Mehta A, Vasile S, Smith LH, McLean PJ. Targeting  $\alpha$ -  
12 synuclein oligomers by protein-fragment complementation for drug discovery in  
13 synucleinopathies. *Expert Opin Ther Targets* 2015; 19(5): 589-603.  
14  
15  
16  
17 30. Wilms H, Rosenstiel P, Romero-Ramos M, et al. Suppression of MAP kinases  
18 inhibits microglial activation and attenuates neuronal cell death induced by  
19 alpha-synuclein protofibrils. *Int J Immunopathol Pharmacol* 2009; 22(4):897-  
20 909.  
21  
22  
23  
24  
25  
26 31. Sampson TR, Debelius JW, Thron T, et al. Gut Microbiota Regulate Motor  
27 Deficits and Neuroinflammation in a Model of Parkinson's Disease. *Cell* 2016;  
28 167(6):1469-1480.  
29  
30  
31  
32  
33  
34  
35  
36  
37  
38  
39  
40  
41  
42  
43  
44  
45  
46  
47  
48  
49  
50  
51  
52  
53  
54  
55  
56  
57  
58  
59  
60

## Figures

Figure 1. Population pyramid with age and sex distribution of the groups with possible inflammatory bowel disease (IBD) and possible Parkinson's disease (PD)

## Tables

Table 1. Age and sex adjusted risk of possible Parkinson's disease in individuals with possible inflammatory bowel disease

| Variable       |                              | $\beta_1$ | OR (95 % CI)     | p             |
|----------------|------------------------------|-----------|------------------|---------------|
| "Possible PD"  |                              | -0.28     | 0.75 (0.57-0.98) | <b>0.0362</b> |
| Adjusted model | "Possible PD"                | -0.06     | 0.94 (0.72-1.23) | 0.657         |
|                | "Possible PD" $\leq$ 65 yrs. | -1.28     | 0.28 (0.10-0.74) | <b>0.0103</b> |
|                | "Possible PD" $>$ 65 yrs.    | 0.16      | 1.17 (0.89-1.54) | 0.257         |

Figure 1

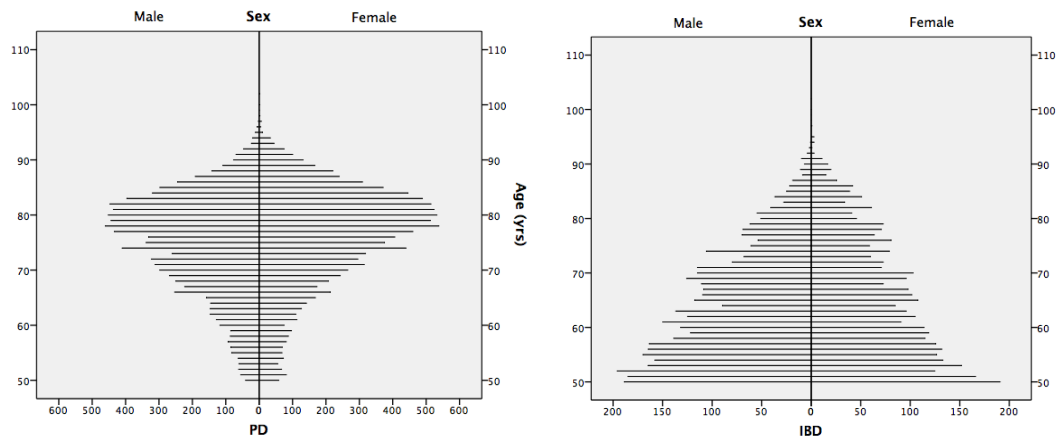

Figure 1. Population pyramid with age and sex distribution of the groups with possible inflammatory bowel disease (IBD) and possible Parkinson's disease (PD)

# Reporting checklist for cross sectional study.

Based on the STROBE cross sectional guidelines.

## Instructions to authors

Complete this checklist by entering the page numbers from your manuscript where readers will find each of the items listed below.

Your article may not currently address all the items on the checklist. Please modify your text to include the missing information. If you are certain that an item does not apply, please write "n/a" and provide a short explanation.

Upload your completed checklist as an extra file when you submit to a journal.

In your methods section, say that you used the STROBE cross sectional reporting guidelines, and cite them as:

von Elm E, Altman DG, Egger M, Pocock SJ, Gotsche PC, Vandembroucke JP. The Strengthening the Reporting of Observational Studies in Epidemiology (STROBE) Statement: guidelines for reporting observational studies.

|                        |     | Reporting Item                                                                                                                  | Page Number |
|------------------------|-----|---------------------------------------------------------------------------------------------------------------------------------|-------------|
| Title                  | #1a | Indicate the study's design with a commonly used term in the title or the abstract                                              | 1           |
| Abstract               | #1b | Provide in the abstract an informative and balanced summary of what was done and what was found                                 | 2           |
| Background / rationale | #2  | Explain the scientific background and rationale for the investigation being reported                                            | 4           |
| Objectives             | #3  | State specific objectives, including any prespecified hypotheses                                                                | 5           |
| Study design           | #4  | Present key elements of study design early in the paper                                                                         | 6,7         |
| Setting                | #5  | Describe the setting, locations, and relevant dates, including periods of recruitment, exposure, follow-up, and data collection | 6,7         |
| Eligibility criteria   | #6a | Give the eligibility criteria, and the sources and methods of selection of participants.                                        | 6,7         |

|    |                  |      |                                                                   |     |
|----|------------------|------|-------------------------------------------------------------------|-----|
| 1  |                  | #7   | Clearly define all outcomes, exposures, predictors, potential     | 6,7 |
| 2  |                  |      | confounders, and effect modifiers. Give diagnostic criteria, if   |     |
| 3  |                  |      | applicable                                                        |     |
| 4  |                  |      |                                                                   |     |
| 5  |                  |      |                                                                   |     |
| 6  | Data sources /   | #8   | For each variable of interest give sources of data and details of | 6,7 |
| 7  | measurement      |      | methods of assessment (measurement). Describe                     |     |
| 8  |                  |      | comparability of assessment methods if there is more than one     |     |
| 9  |                  |      | group. Give information separately for for exposed and            |     |
| 10 |                  |      | unexposed groups if applicable.                                   |     |
| 11 |                  |      |                                                                   |     |
| 12 |                  |      |                                                                   |     |
| 13 |                  |      |                                                                   |     |
| 14 | Bias             | #9   | Describe any efforts to address potential sources of bias         | 6,7 |
| 15 |                  |      |                                                                   |     |
| 16 |                  |      |                                                                   |     |
| 17 | Study size       | #10  | Explain how the study size was arrived at                         | 6,7 |
| 18 |                  |      |                                                                   |     |
| 19 | Quantitative     | #11  | Explain how quantitative variables were handled in the            | 6,7 |
| 20 | variables        |      | analyses. If applicable, describe which groupings were chosen,    |     |
| 21 |                  |      | and why                                                           |     |
| 22 |                  |      |                                                                   |     |
| 23 |                  |      |                                                                   |     |
| 24 | Statistical      | #12a | Describe all statistical methods, including those used to control | 6,7 |
| 25 | methods          |      | for confounding                                                   |     |
| 26 |                  |      |                                                                   |     |
| 27 |                  |      |                                                                   |     |
| 28 |                  | #12b | Describe any methods used to examine subgroups and                | 6,7 |
| 29 |                  |      | interactions                                                      |     |
| 30 |                  |      |                                                                   |     |
| 31 |                  |      |                                                                   |     |
| 32 |                  | #12c | Explain how missing data were addressed                           | 6,7 |
| 33 |                  |      |                                                                   |     |
| 34 |                  |      |                                                                   |     |
| 35 |                  | #12d | If applicable, describe analytical methods taking account of      | 6,7 |
| 36 |                  |      | sampling strategy                                                 |     |
| 37 |                  |      |                                                                   |     |
| 38 |                  |      |                                                                   |     |
| 39 |                  | #12e | Describe any sensitivity analyses                                 | 6,7 |
| 40 |                  |      |                                                                   |     |
| 41 | Participants     | #13a | Report numbers of individuals at each stage of study—eg           | 8   |
| 42 |                  |      | numbers potentially eligible, examined for eligibility, confirmed |     |
| 43 |                  |      | eligible, included in the study, completing follow-up, and        |     |
| 44 |                  |      | analysed. Give information separately for for exposed and         |     |
| 45 |                  |      | unexposed groups if applicable.                                   |     |
| 46 |                  |      |                                                                   |     |
| 47 |                  |      |                                                                   |     |
| 48 |                  |      |                                                                   |     |
| 49 |                  | #13b | Give reasons for non-participation at each stage                  | 8   |
| 50 |                  |      |                                                                   |     |
| 51 |                  |      |                                                                   |     |
| 52 |                  | #13c | Consider use of a flow diagram                                    | 8   |
| 53 |                  |      |                                                                   |     |
| 54 | Descriptive data | #14a | Give characteristics of study participants (eg demographic,       | 8   |
| 55 |                  |      | clinical, social) and information on exposures and potential      |     |
| 56 |                  |      | confounders. Give information separately for exposed and          |     |
| 57 |                  |      | unexposed groups if applicable.                                   |     |
| 58 |                  |      |                                                                   |     |
| 59 |                  |      |                                                                   |     |
| 60 |                  |      |                                                                   |     |

|    |                  |      |                                                                      |       |
|----|------------------|------|----------------------------------------------------------------------|-------|
| 1  |                  | #14b | Indicate number of participants with missing data for each           | 8     |
| 2  |                  |      | variable of interest                                                 |       |
| 3  |                  |      |                                                                      |       |
| 4  |                  |      |                                                                      |       |
| 5  | Outcome data     | #15  | Report numbers of outcome events or summary measures.                | 8     |
| 6  |                  |      | Give information separately for exposed and unexposed                |       |
| 7  |                  |      | groups if applicable.                                                |       |
| 8  |                  |      |                                                                      |       |
| 9  |                  |      |                                                                      |       |
| 10 | Main results     | #16a | Give unadjusted estimates and, if applicable, confounder-            | 8     |
| 11 |                  |      | adjusted estimates and their precision (eg, 95% confidence           |       |
| 12 |                  |      | interval). Make clear which confounders were adjusted for and        |       |
| 13 |                  |      | why they were included                                               |       |
| 14 |                  |      |                                                                      |       |
| 15 |                  |      |                                                                      |       |
| 16 |                  |      |                                                                      |       |
| 17 |                  | #16b | Report category boundaries when continuous variables were            | 8     |
| 18 |                  |      | categorized                                                          |       |
| 19 |                  |      |                                                                      |       |
| 20 |                  |      |                                                                      |       |
| 21 |                  | #16c | If relevant, consider translating estimates of relative risk into    | 8     |
| 22 |                  |      | absolute risk for a meaningful time period                           |       |
| 23 |                  |      |                                                                      |       |
| 24 | Other analyses   | #17  | Report other analyses done—e.g., analyses of subgroups and           | 8     |
| 25 |                  |      | interactions, and sensitivity analyses                               |       |
| 26 |                  |      |                                                                      |       |
| 27 |                  |      |                                                                      |       |
| 28 | Key results      | #18  | Summarise key results with reference to study objectives             | 9     |
| 29 |                  |      |                                                                      |       |
| 30 |                  |      |                                                                      |       |
| 31 | Limitations      | #19  | Discuss limitations of the study, taking into account sources of     | 11,12 |
| 32 |                  |      | potential bias or imprecision. Discuss both direction and            |       |
| 33 |                  |      | magnitude of any potential bias.                                     |       |
| 34 |                  |      |                                                                      |       |
| 35 |                  |      |                                                                      |       |
| 36 | Interpretation   | #20  | Give a cautious overall interpretation considering objectives,       | 9-11  |
| 37 |                  |      | limitations, multiplicity of analyses, results from similar studies, |       |
| 38 |                  |      | and other relevant evidence.                                         |       |
| 39 |                  |      |                                                                      |       |
| 40 |                  |      |                                                                      |       |
| 41 | Generalisability | #21  | Discuss the generalisability (external validity) of the study        | 12    |
| 42 |                  |      | results                                                              |       |
| 43 |                  |      |                                                                      |       |
| 44 |                  |      |                                                                      |       |
| 45 | Funding          | #22  | Give the source of funding and the role of the funders for the       | 13    |
| 46 |                  |      | present study and, if applicable, for the original study on which    |       |
| 47 |                  |      | the present article is based                                         |       |
| 48 |                  |      |                                                                      |       |
| 49 |                  |      |                                                                      |       |

The STROBE checklist is distributed under the terms of the Creative Commons Attribution License CC-BY. This checklist was completed on 22. July 2018 using <http://www.goodreports.org/>, a tool made by the [EQUATOR Network](#) in collaboration with [Penelope.ai](#)



# BMJ Open

## ASSOCIATION OF PARKINSON'S DISEASE AND TREATMENT WITH AMINOSALICYLATES IN INFLAMMATORY BOWEL DISEASE: A CROSS-SECTIONAL STUDY

|                                 |                                                                                                                                                                                                                                                                                                                                                                                                                                                                                                                                                                                                                                                                                                                                                                                                                                                                                                                                                           |
|---------------------------------|-----------------------------------------------------------------------------------------------------------------------------------------------------------------------------------------------------------------------------------------------------------------------------------------------------------------------------------------------------------------------------------------------------------------------------------------------------------------------------------------------------------------------------------------------------------------------------------------------------------------------------------------------------------------------------------------------------------------------------------------------------------------------------------------------------------------------------------------------------------------------------------------------------------------------------------------------------------|
| Journal:                        | <i>BMJ Open</i>                                                                                                                                                                                                                                                                                                                                                                                                                                                                                                                                                                                                                                                                                                                                                                                                                                                                                                                                           |
| Manuscript ID                   | bmjopen-2018-025574.R1                                                                                                                                                                                                                                                                                                                                                                                                                                                                                                                                                                                                                                                                                                                                                                                                                                                                                                                                    |
| Article Type:                   | Research                                                                                                                                                                                                                                                                                                                                                                                                                                                                                                                                                                                                                                                                                                                                                                                                                                                                                                                                                  |
| Date Submitted by the Author:   | 05-Feb-2019                                                                                                                                                                                                                                                                                                                                                                                                                                                                                                                                                                                                                                                                                                                                                                                                                                                                                                                                               |
| Complete List of Authors:       | Pinel Ríos, Javier; Hospital Vithas Xanit Internacional, Neuroscience unit<br>Madrid Navarro, Carlos; University Hospitals of Granada, Institute of Bio-health Research ibs, Department of Neurology<br>Pérez Navarro, María; University Hospitals of Granada, Institute of Bio-health Research ibs, Department of Neurology<br>Cabello Tapia, María; University Hospitals of Granada, Department of Digestive Diseases<br>Piña Vera, María ; Andalusian Health Service Pharmacy and Benefit Support Department<br>Campos Arillo, Víctor; Hospital Vithas Xanit Internacional, Neuroscience unit<br>Gómez García, María; University Hospitals of Granada, Department of Digestive Diseases<br>Mínguez Castellanos, Adolfo; University Hospitals of Granada, Institute of Bio-health Research ibs, Department of Neurology<br>Escamilla Sevilla, Francisco; University Hospitals of Granada, Institute of Bio-health Research ibs, Department of Neurology |
| <b>Primary Subject Heading</b>: | Neurology                                                                                                                                                                                                                                                                                                                                                                                                                                                                                                                                                                                                                                                                                                                                                                                                                                                                                                                                                 |
| Secondary Subject Heading:      | Gastroenterology and hepatology                                                                                                                                                                                                                                                                                                                                                                                                                                                                                                                                                                                                                                                                                                                                                                                                                                                                                                                           |
| Keywords:                       | 5-ASA, Parkinson's disease, Inflammatory bowel disease < GASTROENTEROLOGY, alpha-synuclein, microbiota, prevalence                                                                                                                                                                                                                                                                                                                                                                                                                                                                                                                                                                                                                                                                                                                                                                                                                                        |
|                                 |                                                                                                                                                                                                                                                                                                                                                                                                                                                                                                                                                                                                                                                                                                                                                                                                                                                                                                                                                           |

SCHOLARONE™  
Manuscripts

# Association of Parkinson's disease and treatment with aminosalicylates in inflammatory bowel disease: a cross-sectional study on drug dispensation records.

Javier Pinel-Ríos<sup>1</sup>, MD; Carlos Javier Madrid-Navarro<sup>2</sup>, MD; María José Pérez-Navarro<sup>2</sup>, MD; María José Cabello-Tapia<sup>3</sup>, MD; María José Piña-Vera<sup>4</sup>; Víctor Campos-Arillo<sup>1</sup>, MD, PhD; María Rosario Gómez-García<sup>3</sup>, MD; Adolfo Mínguez-Castellanos<sup>2</sup>, MD, PhD; Francisco Escamilla-Sevilla<sup>2</sup>, MD, PhD.

1: Department of Neurology, Vithas Xanit International Hospital, Benalmadena, Malaga, Spain.

2: Department of Neurology, University Hospitals of Granada, Institute of Bio-health Research ibs. Granada, Spain.

3: Department of Digestive Diseases, University Hospitals of Granada, Granada, Spain.

4: Andalusian Health Service Pharmacy and Benefit Support Department. Spain.

## Correspondence:

*Dr. Javier Pinel-Ríos, MD*

Unidad de Neurociencias, Av. de los Argonautas, s/n, 29631 Benalmadena, Malaga, Spain. Email: javierpinelr@gmail.com. Tel: +34652885523. Fax: +34952367197

*Dr. Francisco Escamilla-Sevilla, MD PhD.*

Email: fescamilla@hotmail.com

**Running Title:** Parkinson's disease and inflammatory bowel disease

**Word Count:** 2062

**Key words:** 5-ASA, Parkinson's disease, inflammatory bowel disease, alpha-synuclein, microbiota, prevalence.

**Language style:** British English

## Abstract

**Objectives:** To analyze the association between aminosalicylate-treated inflammatory bowel disease (IBD) and Parkinson's disease (PD) at population level.

**Design:** Cross-sectional study.

**Setting:** The study was performed based on electronic drug prescription and dispensation records of the Andalusian Public Health System.

**Participants:** All individuals aged  $\geq 50$  yrs with at least one drug dispensation during December 2014 were identified from the records.

**Primary and secondary outcome measures:** Groups were formed: "Possible PD" group, including all who received an anti-Parkinson agent; "Possible IBD" group, those treated with mesalazine and/or derivatives (5-aminosalicylic acid [ASA]); and "Possible PD and IBD", including those receiving both anti-Parkinson agent and 5-ASA.

Prevalence of "Possible PD" was determined among those with "Possible IBD" and among those without this condition. The age- and sex-adjusted OR was calculated.

**Results:** We recorded 2,020,868 individuals (68 $\pm$ 11 yrs., 56 % female), 19,966 were included in "Possible PD" group (75 $\pm$ 9 yrs., 53 % female) and 7,485 in "Possible IBD" group (64 $\pm$ 10 yrs., 47 % female); only 56 were included in both groups (76 $\pm$ 8 yrs., 32 % female). The prevalence of "Possible PD" was 0.7% among those with "Possible IBD" and 1 % among those without this condition (adjusted OR=0.94; 95 % CI=0.72-1.23; p=0.657). OR was 0.28 in individuals aged  $\leq 65$  years (95 % CI=0.10-0.74; p=0.01) and 1.17 in older individuals (95 % CI=0.89-1.54; p=0.257).

**Conclusions:** Within the limitations of this study, the results suggest a protective role for IBD and/or 5-ASA against PD development, especially among under 65-year-olds. Further studies are warranted to explore this association given its scientific and therapeutic implications.

**Article Summary: Strengths and limitations of this study**

- This study provides evidence for a better understanding on the association of inflammatory bowel disease and Parkinson's disease.
- Parkinson's disease and inflammatory bowel disease share some etiopathogenic features at the enteric level.
- This cross-sectional study explore associations between PD and IBD treated with mesalazine (5-aminosalicylic acid) or its derivative sulfasalazine.
- This study has limitations related to the utilization of a drug dispensation record, and there is also a potential classification error related to the selection of proxy variables.

## Introduction

Parkinson's disease (PD) is a multisystemic process with early involvement of the peripheral autonomic nervous system and subsequent propagation to the central nervous system [1]. After reports of deposits of alpha-synuclein aggregates that form neurites or Lewy bodies in gastric submucosal and myenteric plexi [1], various clinical and experimental studies described the enteric nervous system as fundamental in the etiopathogenesis of PD [1-5]. Braak's "dual-hit" hypothesis has been endorsed by evidence of the centripetal trans-synaptic and axonal migration of alpha-synuclein aggregates from neurons of the digestive system to brainstem structures such as the dorsal nucleus of the vagus nerve (Braak stage 2) [1-3]. It has been reported that certain components of the microbiota of PD patients can produce rupture of the intestinal barrier and bacterial translocation, which may be responsible for an intestinal proinflammatory status and subsequent alpha-synuclein aggregation and propagation [6,7].

Some features of inflammatory bowel disease (IBD) are similar to those of PD. Thus, their etiopathogenesis involves an anomalous immune response to specific microbiota that would trigger intestinal inflammatory activity in predisposed individuals unable to inhibit this inflammation and without the immunological tolerance characteristic of a healthy intestine [8]. The few studies on the relationship between these diseases have published controversial results, with observations either of no association [9] or of an increased risk of PD only among patients with Crohn's disease [10], attributable to a genetic relationship between these diseases at different *loci*, as revealed in a genome-wide association study [11]. Specifically, mutations in the leucine-rich repeat kinase 2 (LRRK2) gene, recently associated with Crohn's disease, have revealed pleiotropy between this IBD and PD risk [12]. Instead, a meta-analysis of the recent literature

1  
2  
3 showed an increased risk of PD in the IBD population and the increased risk remained  
4  
5 significant when analyzing Crohn's disease and ulcerous colitis subgroups [13].  
6

7  
8 With this background, the objective of this study was to explore associations between  
9  
10 PD and IBD treated with mesalazine (5-aminosalicylic acid) or its derivative  
11  
12 sulfasalazine, hereafter 5-ASA.  
13  
14  
15  
16  
17  
18  
19  
20  
21  
22  
23  
24  
25  
26  
27  
28  
29  
30  
31  
32  
33  
34  
35  
36  
37  
38  
39  
40  
41  
42  
43  
44  
45  
46  
47  
48  
49  
50  
51  
52  
53  
54  
55  
56  
57  
58  
59  
60

For peer review only

## Material and methods

A cross-sectional study was performed based on electronic drug prescription and dispensation records (*Receta XXI*) of the Andalusian Public Health System, which include 98 % of all prescriptions in the region. Andalusia is located in southern Spain and is the most populated autonomous community in the country, with 8,402,000 inhabitants. The study was approved by the Research Ethics Committee of Granada (CEI-GRANADA).

### Subjects

All individuals aged  $\geq 50$  yrs with at least one drug dispensation during December 2014 were identified from the records. Three groups were formed: “Possible PD” group, including all who received an anti-Parkinson agent, such as levodopa in different formulations and/or dopaminergic agonist, excluding those only receiving a single low-dose dopaminergic agonist (ropinirole  $\leq 1$  mg; rotigotine  $\leq 2$  mg; pramipexole  $\leq 0.26$  mg; pergolide  $\leq 1$  mg; cabergoline  $\leq 1$  mg) and/or monoamine oxidase B inhibitor, including those exclusively treated with selegiline or rasagiline; “Possible IBD” group, including all receiving 5-ASA in its different formulations (mesalazine/mesalamine or 5-aminosalicylic acid and sulfasalazine); and “Possible PD and IBD”, including those receiving both anti-Parkinson agent and 5-ASA.

### Study variables

Membership of the “Possible PD” group was the dependent variable, and membership of the “Possible IBD” group, sex, and age were the predictive variables.

### Data gathering

Data were obtained from the computerized databases of the Andalusian Health Service Pharmacy and Benefit Support Department. Anonymity was preserved by masking clinical record numbers.

### ***Data analysis***

In a descriptive analysis, central tendency and dispersion measurements were calculated for quantitative variables and absolute and relative frequencies for qualitative variables, plotting the corresponding graphs. After applying the Kolmogorov-Smirnov test to check data distribution normality, between-group comparisons were evaluated with the Mann-Whitney U for the quantitative variable (age) and with the chi-square test for categorical variables. After controlling for age and sex, the strength of between-group associations was established by constructing a multiple logistic regression model to estimate the odds ratio (OR) and 95 % confidence interval. All tests were two-tailed, and  $p < 0.05$  was considered significant. R and SPSS 21 statistical packages were used for the statistical analysis.

### ***Patient and Public Involvement***

Patients were not involved.



## Results

During December 2014, 2,020,868 individuals aged  $\geq 50$  yrs were dispensed with at least one drug; their mean age was  $67.9 \pm 11.8$  yrs., 56 % were female (mean of  $68.6 \pm 11.5$  yrs) and 44 % were male (mean of  $67.2 \pm 10.7$  yrs.). The study included 27,451 patients (mean age of  $72.3 \pm 10.9$  yrs.; 51 % female) with at least one dispensation of anti-Parkinson agent (“Possible PD”) and/or 5-ASA (“Possible IBD”) after excluding 24 patients with inadequate records (e.g., missing data on age and/or sex) and 6 with unlikely PD (low-dose dopaminergic agonist [0.5 mg cabergoline in 1 case and 0.5 mg ropinirole in 5]); the mean age was slightly higher for the females than for the males ( $73.1 \pm 10.9$  vs.  $71.4 \pm 10.8$  yrs.;  $p=0.0001$ )

A total of 19,966 individuals were considered as “Possible PD” (mean age of  $75.4 \pm 9.3$  yrs.; 53 % females) and 7,485 as “Possible IBD” ( $64.15 \pm 10.4$  yrs.; 47 % females).

Individuals with “Possible PD” were older ( $p=0.0001$ ) and more frequently female ( $p=0.0001$ ) in comparison to those with “Possible IBD” (figure 1). A group of 56 individuals (32 females) were considered both “Possible PD” and “Possible IBD; their mean age was  $75.7 \pm 8.1$  yrs (range, 52-94 yrs), and they showed no differences in age ( $p=0.956$ ) or sex ( $p=0.505$ ) distribution with respect to the “Possible PD” group.

The prevalence of “Possible PD” was 0.7 % in the “Possible IBD” group and 1 % in those without this condition (Table 1). “Possible IBD” showed a reduced risk for “Possible PD” with OR of 0.75 (95 % CI=0.57-0.98;  $p=0.036$ ), rising to 0.94 (95 % CI=0.72-1.23;  $p=0.657$ ) after controlling for age and sex; stratification by age yielded an OR of 0.28 (95 % CI=0.10-0.74;  $p=0.01$ ) for individuals aged  $\leq 65$  years and 1.17 (95 % CI =0.89-1.54;  $p=0.257$ ) for those aged  $> 65$  years, after controlling for sex (Table 2).

## Discussion

The results of this cross-sectional study suggest that the presence of IBD and/or treatment with 5-ASA may play a protective role against PD development, especially among under-65-year-olds. The pathogenesis of the two diseases may share certain features, including the role of enteric glial cells [14-16] and inflammation [17], genetic factors (PD and Crohn's disease) [11], the protective effect of tobacco (PD and ulcerous colitis) [18], the presence of proinflammatory flora, and altered permeability with rupture of the intestinal barrier [6,7]. In fact, the inflammatory condition and/or treatment with 5-ASA might have been expected to act as a risk rather than protective factor, unless they have some impact on the pathogenesis of this synucleinopathy. Our results are similar to those of the recent case-control study of PD risk based on Medicare data; this group found an inverse association between IBD and PD, including both Crohn's disease and ulcerous colitis. Similarly, there was an inverse association between PD and IBD-associated conditions, as well as IBD associated surgical procedures and immunosuppressant use, even among beneficiaries without IBD. The authors suggest that IBD is associated with a lower risk of developing PD in the adjusted model for a population aged > 65 years (OR = 0.86; 95% CI=0.81-0.92) [19]. Conversely, a retrospective cohort study based on healthcare records found an increased risk of PD among IBD patients, especially those with Crohn's disease, given that this association was not observed in the subgroup with ulcerous colitis (OR = 0.94; 95 % CI=0.49-1.84) [10]. Although these cases were not specified in our study, they can largely be considered to have ulcerous colitis, given reservations in clinical guidelines about the administration of 5-ASA in Crohn's disease [20]. In the aforementioned cohort study, there was a relative reduction in PD risk among patients with longer

1  
2  
3 follow-up times, similar to observations in individuals with truncal vagotomy [21,22]  
4  
5 and in under 65year-olds, as in the present study.  
6

7  
8 Recently three studies have been published describing a risk association between IBD  
9  
10 and PD. In the Danish nationwide population cohort study, covering the period 1977-  
11  
12 2014, found a significantly increased risk of PD when comparing patients with IBD  
13  
14 with non-IBD (HR=1.22; 95% CI=1.09-1.35), especially among patients with ulcerative  
15  
16 colitis (HR=1.35; 95% CI=1.20-1.52). However, in those patients diagnosed with IBD  
17  
18 under 40 years of age and with prolonged follow-up > 20 years, this increase was not  
19  
20 statistically significant [23], suggesting, as we have previously referred, that IBD  
21  
22 treatment may lessen the risk of PD. In a similar way, a Nationwide Swedish Cohort  
23  
24 Study, covering the period 2002-2014, found that IBD is associated with an increased  
25  
26 risk of PD, however IBD patients who developed PD were much older at the end of  
27  
28 follow-up (88% vs 35% at age  $\geq 60$  years;  $p=0.001$ ) and more likely to never have  
29  
30 received thiopurine or anti-TNF compared with those without PD (88% vs 66%;  $p=$   
31  
32 0.001), 80% of PD events occurred in patients with IBD onset  $\geq 60$  years and the relative  
33  
34 risk of future PD in IBD was highest among patients diagnosed with IBD at age 60  
35  
36 years or older. Authors suggested a potential protective effect of selective IBD-directed  
37  
38 therapies, thiopurines, or anti-TNF- $\alpha$  on PD, as IBD patients never exposed to  
39  
40 thiopurines or anti-TNF were 60% more likely to develop PD (HR, 1.6;95% CI, 1.2–  
41  
42 2.2) than their matched reference individuals [24], raising again the protective effect of  
43  
44 the treatment of IBD on the development of PD. In a retrospective cohort study, based  
45  
46 on the Market-Scan Commercial and Medicare databases, a higher incidence of PD was  
47  
48 observed among patients with IBD than among individuals without IBD; the authors  
49  
50 found a statistically significant 28% increase in the incidence of PD among patients  
51  
52 with IBD compared with the unaffected matched controls. Conversely, they observed a  
53  
54  
55  
56  
57  
58  
59  
60

1  
2  
3 markedly lower PD incidence rate (0.08 per 1000 patient-years) among patients with  
4 IBD who were exposed to anti-TNF therapy compared with patients without exposure  
5 (0.76 per 1000 patient-years), which means a 78% reduction in the PD incidence rate  
6 [25], a risk reduction in the same range as that found in our patients treated with 5-ASA.  
7  
8 Despite the contradictory associations between both processes, two studies find a  
9  
10 reduction in the risk of PD related to the use of immunomodulators [19,25], although  
11  
12 they do not describe the degree of exposure to 5-ASA. It is presumable that those with a  
13  
14 more active disease and therefore candidates for immunomodulators therapies will have  
15  
16 had a greater exposure to 5-ASA, but it is also possible that those treated exclusively  
17  
18 with 5-ASA have a more benign inflammatory disease.  
19  
20

21  
22 5-ASA drugs are the first-line treatment in ulcerous colitis [20,26]. Their action  
23  
24 mechanism is not fully elucidated but is considered to include: a) anti-inflammatory  
25  
26 activity or inhibition of the local synthesis of prostaglandins and leukotrienes [27]; b)  
27  
28 reduction in nitric oxide and IL-6 production and an antiapoptotic effect, diminishing  
29  
30 phosphorylation by mitogen-activated protein kinases (MAPKs), e.g., p38 and JNK (c-  
31  
32 Jun N-terminal kinases) [28]; and c) action on the microbiota, producing qualitative and  
33  
34 quantitative changes in its composition [29].  
35  
36

37  
38 In PD, alpha-synuclein aggregates are known to be present in the intestine some years  
39  
40 before the onset of motor symptoms [4,5], especially in certain structures such as the  
41  
42 vermiform appendix [30]. Local action mechanisms of 5-ASA described above may  
43  
44 affect progression of the synucleinopathy, given that they may act on etiopathogenetic  
45  
46 mechanisms that would activate microglia, associated with certain microbiota and  
47  
48 bacterial membrane lipopolysaccharides or endogenous factors (e.g., JNK and p38) [31-  
49  
50  
51  
52  
53  
54  
55  
56  
57  
58  
59  
60 33].

1  
2  
3 In a recent murine model with alpha-synuclein overexpression, transplantation from PD  
4 patients of fecal matter with greater short-chain fatty-acid content was followed by  
5  
6 microglial activation, an increase in inflammation mediators (TNF- $\alpha$  and IL-6) and in  
7  
8 alpha-synuclein aggregation and propagation, a poorer execution of motor tests, and  
9  
10 even constipation; these changes were reduced by treatment with minocycline [34],  
11  
12 suggesting that other drug groups, such as 5-ASA, may have a similar effect.  
13  
14

15  
16 This study has limitations related to the utilization of a drug dispensation record,  
17  
18 subjects therefore not be considered representative of the general population. The  
19  
20 resulting ORs may be overestimated, because the prevalence of both diseases was over-  
21  
22 represented but in an unequal manner, being higher for PD in the study population than  
23  
24 in the general population and only slightly higher for IBD. Cross-sectional drug  
25  
26 dispensation studies are more likely to include patients with PD than with IBD due to  
27  
28 their older age and more frequent polymedication and because some biological and  
29  
30 immunosuppressive therapies received by IBD patients in the hospital are not included  
31  
32 in the dispensary records. Furthermore, individuals treated with 5-ASA are a subgroup  
33  
34 of patients with IBD and ulcerous colitis, mainly in those with active disease. We did  
35  
36 not control for the possibility of a group of patients receiving combined maintenance  
37  
38 therapy (5-ASA and other drugs). There is also a potential classification error related to  
39  
40 the selection of *proxy* variables, given that the diseases under study were identified  
41  
42 according to the medication received. Notably, dopaminergic drugs are prescribed,  
43  
44 although much less frequently, for diseases other than PD (atypical parkinsonism,  
45  
46 chronic adult hydrocephaly, restless legs syndrome, etc.); however, this is unlikely to  
47  
48 have affected the validity of our results given the large sample size.  
49  
50  
51  
52  
53  
54  
55  
56  
57  
58  
59  
60

## Conclusions

A lower risk of PD was observed in individuals with IBD aged  $\leq 65$  years and treated with 5-ASA, which may be, as hypothesis, related to a theoretical pharmacological effect on alpha-synuclein aggregation and propagation that could reduce or delay PD onset in at-risk populations. The advantages of 5-ASA medication include its relatively low cost and lack of absorption. Within the limitations of the methodology applied, further experimental research with animal models and new longitudinal studies are warranted, given the important scientific and therapeutic implications of these findings.

**Acknowledgments:** None

**Funding statement:** This research received no specific grant from any funding agency in the public, commercial or not-for-profit sectors.

**Conflict of interest:** The authors declare they have no conflict of interest.

**Author Contributions:** JP, FE and VC contributed conception and design of the study; MPN, MPV and CM organized the database; FE and AM performed the statistical analysis; JP wrote the first draft of the manuscript; FE, CM, MC and MG wrote sections of the manuscript. All authors contributed to manuscript revision, read and approved the submitted version.

**Data sharing statement:** No additional data are available.

## References

1. Braak H, Rüb U, Gai WP, Del Tredici K. Idiopathic Parkinson's disease: possible routes by which vulnerable neuronal types may be subject to neuroinvasion by an unknown pathogen. *J Neural Transm* 2003; 110: 517–36.
2. Pan-Montojo F, Anichtchik O, Dening Y, et al. Progression of Parkinson's disease pathology is reproduced by intragastric administration of rotenone in mice. *PLoS ONE* 2010; 5: e8762.
3. Holmqvist S, Chutna O, Bousset L, et al. Direct evidence of Parkinson pathology spread from the gastrointestinal tract to the brain in rats. *Acta Neuropathol* 2014; 128: 805–20.
4. Hilton D, Stephens M, Kirk L, et al. Accumulation of  $\alpha$ -synuclein in the bowel of patients in the pre-clinical phase of Parkinson's disease. *Acta Neuropathol* 2013; 127: 235–41.
5. Mínguez-Castellanos A, Chamorro CE, Escamilla-Sevilla F, et al. Do alpha-synuclein aggregates in autonomic plexuses predate Lewy body disorders?: a cohort study. *Neurology* 2007; 68: 2012–8.
6. Kelly LP, Carvey PM, Keshavarzian A, et al. Progression of intestinal permeability changes and alpha-synuclein expression in a mouse model of Parkinson's disease. *Mov Disord* 2013; 29: 999–1009.
7. Forsyth CB, Shannon KM, Kordower JH, et al. Increased intestinal permeability correlates with sigmoid mucosa alpha-synuclein staining and endotoxin exposure markers in early Parkinson's Disease. *PLoS ONE* 2011; 6: e28032–10.

- 1  
2  
3 8. Sheehan D, Moran C, Shanahan F. The microbiota in inflammatory bowel  
4  
5 disease. *J Gastroenterol* 2015; 50 (5): 495-507.  
6
- 7  
8 9. Rugbjerg K, Friis S, Ritz B, Schernhammer ES, Korbo L, Olsen JH.  
9  
10 Autoimmune disease and risk for Parkinson disease: a population-based case-  
11  
12 control study. *Neurology* 2009; 73: 1462–8.  
13
- 14  
15 10. Lin JC, Lin CS, Hsu CW, Lin CL, Kao CH. Association Between Parkinson's  
16  
17 Disease and Inflammatory Bowel Disease: a Nationwide Taiwanese  
18  
19 Retrospective Cohort Study. *Inflamm Bowel Dis* 2016; 22(5): 1049-55.  
20
- 21  
22 11. Nalls MA, Saad M, Noyce AJ, et al. Genetic comorbidities in Parkinson's  
23  
24 disease. *Hum Mol Genet* 2014; 23: 831–41.  
25
- 26  
27 12. Hui KY, Fernandez-Hernandez H, Hu J, et al. Functional variants in the *LRRK2*  
28  
29 gene confer shared effects on risk for Crohn's disease and Parkinson's disease.  
30  
31 *Sci Transl Med* 2018; 10 (423).  
32
- 33  
34 13. Zhu F, Li C, Gong J, Zhu W, Gu L, Li N. The risk of Parkinson's disease in  
35  
36 inflammatory bowel disease: A systematic review and meta-analysis. *Dig Liver*  
37  
38 *Dis* 2019; 51: 38–42.  
39
- 40  
41 14. Clairembault T, Leclair-Visonneau L, Neunlist M, Derkinderen P. Enteric glial  
42  
43 cells: New players in Parkinson's disease? *Mov Disord* 2015; 30(4):494-8.  
44
- 45  
46 15. Ochoa-Cortes F, Turco F, Linan-Rico A, et al. Enteric Glial Cells: A New  
47  
48 Frontier in Neurogastroenterology and Clinical Target for Inflammatory Bowel  
49  
50 Diseases. *Inflamm Bowel Dis* 2016; 22(2): 433-49.  
51
- 52  
53 16. Capoccia E, Cirillo C, Gigli S, et al. Enteric glia: A new player in inflammatory  
54  
55 bowel diseases. *Int J Immunopathol Pharmacol.* 2015; 28(4): 443-51.  
56
- 57  
58 17. Devos D, Lebouvier T, Lardeux B, et al. Colonic inflammation in Parkinson's  
59  
60 disease. *Neurobiol Dis* 2013; 50: 42–8.



- 1  
2  
3 18. Derkinderen P, Shannon KM, Brundin P. Gut feelings about smoking and coffee  
4  
5 in Parkinson's disease. *Mov Disord* 2014; 29: 976–9.  
6  
7
- 8 19. Camacho-Soto A, Gross A, Nielsen S.S. et al, Inflammatory bowel disease and  
9  
10 risk of Parkinson's disease in Medicare beneficiaries. *Parkinsonism Relat Disord*  
11  
12 2018; 50:23–28.  
13
- 14 20. Mowat C, Cole A, Windsor A, et al. Guidelines for the management of  
15  
16 inflammatory bowel disease in adults. *Gut* 2011; 60: 571-607.  
17  
18
- 19 21. Liu B, Fang F, Pedersen NL, et al. Vagotomy and Parkinson disease: A Swedish  
20  
21 register-based matched-cohort study. *Neurology* 2017; 88(21): 1996-2002.  
22  
23
- 24 22. Svensson E, Horváth-Puhó E, Thomsen RW, et al. Vagotomy and subsequent  
25  
26 risk of Parkinson's disease. *Ann Neurol* 2015; 78(4): 522-9.  
27  
28
- 29 23. Villumsen M, Aznar S, Pakkenberg B, et al. Inflammatory bowel disease  
30  
31 increases the risk of Parkinson's disease: a Danish nationwide cohort  
32  
33 study 1977–2014. *Gut* 2018; 0:1–7.  
34
- 35 24. Weimers P, Halfvarson J, Sachs MC, et al. Inflammatory Bowel Disease and  
36  
37 Parkinson's Disease: A Nationwide Swedish Cohort Study. *Inflamm Bowel Dis*  
38  
39 2019 Jan 1;25(1):111-123.  
40
- 41 25. Peter I, Dubinsky M, Bressman S, et al. Anti-tumor necrosis factor therapy and  
42  
43 incidence of Parkinson disease among patients with inflammatory bowel  
44  
45 disease. *JAMA Neurol* 2018; 75: 939–46.  
46  
47
- 48 26. Ford AC, Achkar JP, Khan KJ, et al. Efficacy of 5-aminosalicylates in ulcerative  
49  
50 colitis: systematic review and meta-analysis. *Am J Gastroenterol* 2011; 106:601.  
51  
52
- 53 27. Greenfield SM, Pouchard NA, Teare JP. et al. Review article: The mode of  
54  
55 action of the aminosalicylates in inflammatory bowel disease. *Aliment*  
56  
57 *Pharmacol Ther* 1993; 7: 369-383.  
58  
59  
60

- 1  
2  
3 28. Qu T, Wang E, Jin B, Li W, Liu R, Zhao ZB. 5-Aminosalicylic acid inhibits  
4  
5 inflammatory responses by suppressing JNK and p38 activity in murine  
6  
7 macrophages. *Immunopharmacol Immunotoxicol* 2017; 39(1): 45-53.  
8  
9
- 10 29. Andrews CN, Griffiths TA, Kaufman J, Vergnolle N, Surette MG, Rioux KP.  
11  
12 Mesalazine (5-aminosalicylic acid) alters faecal bacterial profiles, but not  
13  
14 mucosal proteolytic activity in diarrhoea-predominant irritable bowel syndrome.  
15  
16 *Aliment Pharmacol Ther* 2011; 34(3): 374-83.  
17  
18
- 19 30. Gray MT, Munoz DG, Gray DA, Schlossmacher MG, Woulfe JM. Alpha-  
20  
21 synuclein in the appendiceal mucosa of neurologically intact subjects. *Mov*  
22  
23 *Disord* 2013; 29: 991-8.  
24  
25
- 26 31. Zhang W, Gao JH, Yan ZF, et al. Minimally toxic dose of lipopolysaccharide  
27  
28 and  $\alpha$ -synuclein oligomer elicit synergistic dopaminergic neurodegeneration:  
29  
30 role and mechanism of microglial NOX2 activation. *Mol Neurobiol*. 2016 Dec  
31  
32 15. [Epub ahead of print].  
33  
34
- 35 32. Moussaud S, Malany S, Mehta A, Vasile S, Smith LH, McLean PJ. Targeting  $\alpha$ -  
36  
37 synuclein oligomers by protein-fragment complementation for drug discovery in  
38  
39 synucleinopathies. *Expert Opin Ther Targets* 2015; 19(5): 589-603.  
40  
41
- 42 33. Wilms H, Rosenstiel P, Romero-Ramos M, et al. Suppression of MAP kinases  
43  
44 inhibits microglial activation and attenuates neuronal cell death induced by  
45  
46 alpha-synuclein protofibrils. *Int J Immunopathol Pharmacol* 2009; 22(4):897-  
47  
48 909.  
49  
50
- 51 34. Sampson TR, Debelius JW, Thron T, et al. Gut Microbiota Regulate Motor  
52  
53 Deficits and Neuroinflammation in a Model of Parkinson's Disease. *Cell* 2016;  
54  
55 167(6):1469-1480.  
56  
57  
58  
59  
60

## Figures

Figure 1. Population pyramid with age and sex distribution of the groups with possible inflammatory bowel disease (IBD) and possible Parkinson's disease (PD)

## Tables

**Table 1.** 2x2 contingency table and prevalence of possible PD

|                             | <b>Without Possible PD</b> | <b>With Possible PD</b> | <b>Prevalence Possible PD</b> |
|-----------------------------|----------------------------|-------------------------|-------------------------------|
| <b>Without Possible IBD</b> | 1993473                    | 19966                   | 1%                            |
| <b>With Possible IBD</b>    | 7485                       | 56                      | 0.7%                          |

**Table 2.** Age and sex adjusted risk of possible Parkinson's disease in individuals with possible inflammatory bowel disease

| <b>Variable</b> |                              | <b><math>\beta_1</math></b> | <b>OR (95 % CI)</b> | <b>p</b>      |
|-----------------|------------------------------|-----------------------------|---------------------|---------------|
| "Possible PD"   |                              | -0.28                       | 0.75 (0.57-0.98)    | <b>0.0362</b> |
| Adjusted model  | "Possible PD"                | -0.06                       | 0.94 (0.72-1.23)    | 0.657         |
|                 | "Possible PD" $\leq$ 65 yrs. | -1.28                       | 0.28 (0.10-0.74)    | <b>0.0103</b> |
|                 | "Possible PD" $>$ 65 yrs.    | 0.16                        | 1.17 (0.89-1.54)    | 0.257         |

Figure 1



Figure 1. Population pyramid with age and sex distribution of the groups with possible inflammatory bowel disease (IBD) and possible Parkinson's disease (PD)

# Reporting checklist for cross sectional study.

Based on the STROBE cross sectional guidelines.

## Instructions to authors

Complete this checklist by entering the page numbers from your manuscript where readers will find each of the items listed below.

Your article may not currently address all the items on the checklist. Please modify your text to include the missing information. If you are certain that an item does not apply, please write "n/a" and provide a short explanation.

Upload your completed checklist as an extra file when you submit to a journal.

In your methods section, say that you used the STROBE cross sectional reporting guidelines, and cite them as:

von Elm E, Altman DG, Egger M, Pocock SJ, Gotsche PC, Vandembroucke JP. The Strengthening the Reporting of Observational Studies in Epidemiology (STROBE) Statement: guidelines for reporting observational studies.

|                        |     | Reporting Item                                                                                                                  | Page Number |
|------------------------|-----|---------------------------------------------------------------------------------------------------------------------------------|-------------|
| Title                  | #1a | Indicate the study's design with a commonly used term in the title or the abstract                                              | 1           |
| Abstract               | #1b | Provide in the abstract an informative and balanced summary of what was done and what was found                                 | 2           |
| Background / rationale | #2  | Explain the scientific background and rationale for the investigation being reported                                            | 4           |
| Objectives             | #3  | State specific objectives, including any prespecified hypotheses                                                                | 5           |
| Study design           | #4  | Present key elements of study design early in the paper                                                                         | 6,7         |
| Setting                | #5  | Describe the setting, locations, and relevant dates, including periods of recruitment, exposure, follow-up, and data collection | 6,7         |
| Eligibility criteria   | #6a | Give the eligibility criteria, and the sources and methods of selection of participants.                                        | 6,7         |

|    |                  |      |                                                                   |     |
|----|------------------|------|-------------------------------------------------------------------|-----|
| 1  |                  | #7   | Clearly define all outcomes, exposures, predictors, potential     | 6,7 |
| 2  |                  |      | confounders, and effect modifiers. Give diagnostic criteria, if   |     |
| 3  |                  |      | applicable                                                        |     |
| 4  |                  |      |                                                                   |     |
| 5  |                  |      |                                                                   |     |
| 6  | Data sources /   | #8   | For each variable of interest give sources of data and details of | 6,7 |
| 7  | measurement      |      | methods of assessment (measurement). Describe                     |     |
| 8  |                  |      | comparability of assessment methods if there is more than one     |     |
| 9  |                  |      | group. Give information separately for for exposed and            |     |
| 10 |                  |      | unexposed groups if applicable.                                   |     |
| 11 |                  |      |                                                                   |     |
| 12 |                  |      |                                                                   |     |
| 13 |                  |      |                                                                   |     |
| 14 | Bias             | #9   | Describe any efforts to address potential sources of bias         | 6,7 |
| 15 |                  |      |                                                                   |     |
| 16 |                  |      |                                                                   |     |
| 17 | Study size       | #10  | Explain how the study size was arrived at                         | 6,7 |
| 18 |                  |      |                                                                   |     |
| 19 | Quantitative     | #11  | Explain how quantitative variables were handled in the            | 6,7 |
| 20 | variables        |      | analyses. If applicable, describe which groupings were chosen,    |     |
| 21 |                  |      | and why                                                           |     |
| 22 |                  |      |                                                                   |     |
| 23 |                  |      |                                                                   |     |
| 24 | Statistical      | #12a | Describe all statistical methods, including those used to control | 6,7 |
| 25 | methods          |      | for confounding                                                   |     |
| 26 |                  |      |                                                                   |     |
| 27 |                  |      |                                                                   |     |
| 28 |                  | #12b | Describe any methods used to examine subgroups and                | 6,7 |
| 29 |                  |      | interactions                                                      |     |
| 30 |                  |      |                                                                   |     |
| 31 |                  |      |                                                                   |     |
| 32 |                  | #12c | Explain how missing data were addressed                           | 6,7 |
| 33 |                  |      |                                                                   |     |
| 34 |                  |      |                                                                   |     |
| 35 |                  | #12d | If applicable, describe analytical methods taking account of      | 6,7 |
| 36 |                  |      | sampling strategy                                                 |     |
| 37 |                  |      |                                                                   |     |
| 38 |                  |      |                                                                   |     |
| 39 |                  | #12e | Describe any sensitivity analyses                                 | 6,7 |
| 40 |                  |      |                                                                   |     |
| 41 | Participants     | #13a | Report numbers of individuals at each stage of study—eg           | 8   |
| 42 |                  |      | numbers potentially eligible, examined for eligibility, confirmed |     |
| 43 |                  |      | eligible, included in the study, completing follow-up, and        |     |
| 44 |                  |      | analysed. Give information separately for for exposed and         |     |
| 45 |                  |      | unexposed groups if applicable.                                   |     |
| 46 |                  |      |                                                                   |     |
| 47 |                  |      |                                                                   |     |
| 48 |                  |      |                                                                   |     |
| 49 |                  | #13b | Give reasons for non-participation at each stage                  | 8   |
| 50 |                  |      |                                                                   |     |
| 51 |                  |      |                                                                   |     |
| 52 |                  | #13c | Consider use of a flow diagram                                    | 8   |
| 53 |                  |      |                                                                   |     |
| 54 | Descriptive data | #14a | Give characteristics of study participants (eg demographic,       | 8   |
| 55 |                  |      | clinical, social) and information on exposures and potential      |     |
| 56 |                  |      | confounders. Give information separately for exposed and          |     |
| 57 |                  |      | unexposed groups if applicable.                                   |     |
| 58 |                  |      |                                                                   |     |
| 59 |                  |      |                                                                   |     |
| 60 |                  |      |                                                                   |     |

|    |                  |      |                                                                      |       |
|----|------------------|------|----------------------------------------------------------------------|-------|
| 1  |                  | #14b | Indicate number of participants with missing data for each           | 8     |
| 2  |                  |      | variable of interest                                                 |       |
| 3  |                  |      |                                                                      |       |
| 4  |                  |      |                                                                      |       |
| 5  | Outcome data     | #15  | Report numbers of outcome events or summary measures.                | 8     |
| 6  |                  |      | Give information separately for exposed and unexposed                |       |
| 7  |                  |      | groups if applicable.                                                |       |
| 8  |                  |      |                                                                      |       |
| 9  |                  |      |                                                                      |       |
| 10 | Main results     | #16a | Give unadjusted estimates and, if applicable, confounder-            | 8     |
| 11 |                  |      | adjusted estimates and their precision (eg, 95% confidence           |       |
| 12 |                  |      | interval). Make clear which confounders were adjusted for and        |       |
| 13 |                  |      | why they were included                                               |       |
| 14 |                  |      |                                                                      |       |
| 15 |                  |      |                                                                      |       |
| 16 |                  |      |                                                                      |       |
| 17 |                  | #16b | Report category boundaries when continuous variables were            | 8     |
| 18 |                  |      | categorized                                                          |       |
| 19 |                  |      |                                                                      |       |
| 20 |                  |      |                                                                      |       |
| 21 |                  | #16c | If relevant, consider translating estimates of relative risk into    | 8     |
| 22 |                  |      | absolute risk for a meaningful time period                           |       |
| 23 |                  |      |                                                                      |       |
| 24 | Other analyses   | #17  | Report other analyses done—e.g., analyses of subgroups and           | 8     |
| 25 |                  |      | interactions, and sensitivity analyses                               |       |
| 26 |                  |      |                                                                      |       |
| 27 |                  |      |                                                                      |       |
| 28 | Key results      | #18  | Summarise key results with reference to study objectives             | 9     |
| 29 |                  |      |                                                                      |       |
| 30 |                  |      |                                                                      |       |
| 31 | Limitations      | #19  | Discuss limitations of the study, taking into account sources of     | 11,12 |
| 32 |                  |      | potential bias or imprecision. Discuss both direction and            |       |
| 33 |                  |      | magnitude of any potential bias.                                     |       |
| 34 |                  |      |                                                                      |       |
| 35 |                  |      |                                                                      |       |
| 36 | Interpretation   | #20  | Give a cautious overall interpretation considering objectives,       | 9-11  |
| 37 |                  |      | limitations, multiplicity of analyses, results from similar studies, |       |
| 38 |                  |      | and other relevant evidence.                                         |       |
| 39 |                  |      |                                                                      |       |
| 40 |                  |      |                                                                      |       |
| 41 | Generalisability | #21  | Discuss the generalisability (external validity) of the study        | 12    |
| 42 |                  |      | results                                                              |       |
| 43 |                  |      |                                                                      |       |
| 44 |                  |      |                                                                      |       |
| 45 | Funding          | #22  | Give the source of funding and the role of the funders for the       | 13    |
| 46 |                  |      | present study and, if applicable, for the original study on which    |       |
| 47 |                  |      | the present article is based                                         |       |
| 48 |                  |      |                                                                      |       |
| 49 |                  |      |                                                                      |       |

50 The STROBE checklist is distributed under the terms of the Creative Commons Attribution License  
 51 CC-BY. This checklist was completed on 22. July 2018 using <http://www.goodreports.org/>, a tool  
 52 made by the [EQUATOR Network](#) in collaboration with [Penelope.ai](#)  
 53  
 54  
 55  
 56  
 57  
 58  
 59  
 60

# BMJ Open

## Association of Parkinson's disease and treatment with aminosalicylates in inflammatory bowel disease: a cross-sectional study in a Spain drug dispensation records.

|                                 |                                                                                                                                                                                                                                                                                                                                                                                                                                                                                                                                                                                                                                                                                                                                                                                                                                                           |
|---------------------------------|-----------------------------------------------------------------------------------------------------------------------------------------------------------------------------------------------------------------------------------------------------------------------------------------------------------------------------------------------------------------------------------------------------------------------------------------------------------------------------------------------------------------------------------------------------------------------------------------------------------------------------------------------------------------------------------------------------------------------------------------------------------------------------------------------------------------------------------------------------------|
| Journal:                        | <i>BMJ Open</i>                                                                                                                                                                                                                                                                                                                                                                                                                                                                                                                                                                                                                                                                                                                                                                                                                                           |
| Manuscript ID                   | bmjopen-2018-025574.R2                                                                                                                                                                                                                                                                                                                                                                                                                                                                                                                                                                                                                                                                                                                                                                                                                                    |
| Article Type:                   | Research                                                                                                                                                                                                                                                                                                                                                                                                                                                                                                                                                                                                                                                                                                                                                                                                                                                  |
| Date Submitted by the Author:   | 12-Mar-2019                                                                                                                                                                                                                                                                                                                                                                                                                                                                                                                                                                                                                                                                                                                                                                                                                                               |
| Complete List of Authors:       | Pinel Ríos, Javier; Hospital Vithas Xanit Internacional, Neuroscience unit<br>Madrid Navarro, Carlos; Hospital Universitario Virgen de las Nieves, Department of Neurology<br>Pérez Navarro, María; Hospital Universitario Virgen de las Nieves, Department of Neurology<br>Cabello Tapia, María; Hospital Universitario Virgen de las Nieves, Department of Digestive Diseases<br>Piña Vera, María ; Government of Andalusia Andalusian Health Service<br>Campos Arillo, Víctor; Hospital Vithas Xanit Internacional, Neuroscience unit<br>Gómez García, María; Hospital Universitario Virgen de las Nieves, Department of Digestive Diseases<br>Mínguez Castellanos, Adolfo; Hospital Universitario Virgen de las Nieves, Department of Neurology<br>Escamilla Sevilla, Francisco; Hospital Universitario Virgen de las Nieves, Department of Neurology |
| <b>Primary Subject Heading</b>: | Neurology                                                                                                                                                                                                                                                                                                                                                                                                                                                                                                                                                                                                                                                                                                                                                                                                                                                 |
| Secondary Subject Heading:      | Gastroenterology and hepatology                                                                                                                                                                                                                                                                                                                                                                                                                                                                                                                                                                                                                                                                                                                                                                                                                           |
| Keywords:                       | 5-ASA, Parkinson's disease, Inflammatory bowel disease < GASTROENTEROLOGY, alpha-synuclein, microbiota, prevalence                                                                                                                                                                                                                                                                                                                                                                                                                                                                                                                                                                                                                                                                                                                                        |
|                                 |                                                                                                                                                                                                                                                                                                                                                                                                                                                                                                                                                                                                                                                                                                                                                                                                                                                           |

SCHOLARONE™  
Manuscripts



1  
2  
3  
4  
5  
6  
7  
8  
9  
10  
11  
12  
13  
14  
15  
16  
17  
18  
19  
20

## Association of Parkinson's disease and treatment with aminosalicylates in inflammatory bowel disease: a cross- sectional study in a Spain drug dispensation records.

Javier Pinel-Ríos<sup>1</sup>, MD; Carlos Javier Madrid-Navarro<sup>2</sup>, MD; María José Pérez-Navarro<sup>2</sup>, MD; María José Cabello-Tapia<sup>3</sup>, MD; María José Piña-Vera<sup>4</sup>; Víctor Campos-Arillo<sup>1</sup>, MD, PhD; María Rosario Gómez-García<sup>3</sup>, MD; Adolfo Mínguez-Castellanos<sup>2</sup>, MD, PhD; Francisco Escamilla-Sevilla<sup>2</sup>, MD, PhD.

21  
22  
23  
24  
25  
26  
27  
28  
29  
30  
31  
32  
33  
34

1: Department of Neurology, Vithas Xanit International Hospital, Benalmadena, Malaga, Spain.

2: Department of Neurology, Virgen de las Nieves University Hospital, Institute of Biohealth Research ibs. Granada, Spain.

3: Department of Digestive Diseases, Virgen de las Nieves University Hospital, Granada, Spain.

4: Andalusian Health Service Pharmacy and Benefit Support Department. Spain.

### Correspondence:

*Dr. Javier Pinel-Ríos, MD*

Unidad de Neurociencias, Av. de los Argonautas, s/n, 29631 Benalmadena, Malaga, Spain. Email: javierpinelr@gmail.com. Tel: +34652885523. Fax: +34952367197

*Dr. Francisco Escamilla-Sevilla, MD PhD.*

Email: fescamilla@hotmail.com

46  
47  
48  
49  
50  
51  
52  
53

**Running Title:** Parkinson's disease and inflammatory bowel disease

**Word Count:** 2062

54  
55  
56  
57  
58  
59  
60

**Key words:** 5-ASA, Parkinson's disease, inflammatory bowel disease, alpha-synuclein, microbiota, prevalence.

**Language style:** British English

## Abstract

**Objectives:** To analyze the association between aminosalicylate-treated inflammatory bowel disease (IBD) and Parkinson's disease (PD) at population level.

**Design:** Cross-sectional study.

**Setting:** The study was performed based on electronic drug prescription and dispensation records of the Andalusian Public Health System.

**Participants:** All individuals aged  $\geq 50$  yrs with at least one drug dispensation during December 2014 were identified from the records.

**Primary and secondary outcome measures:** Groups were formed: "Possible PD" group, including all who received an anti-Parkinson agent; "Possible IBD" group, those treated with mesalazine and/or derivatives (5-aminosalicylic acid [ASA]); and "Possible PD and IBD", including those receiving both anti-Parkinson agent and 5-ASA.

Prevalence of "Possible PD" was determined among those with "Possible IBD" and among those without this condition. The age- and sex-adjusted OR was calculated.

**Results:** We recorded 2,020,868 individuals (68 $\pm$ 11 yrs., 56 % female), 19,966 were included in "Possible PD" group (75 $\pm$ 9 yrs., 53 % female) and 7,485 in "Possible IBD" group (64 $\pm$ 10 yrs., 47 % female); only 56 were included in both groups (76 $\pm$ 8 yrs., 32 % female). The prevalence of "Possible PD" was 0.7% among those with "Possible IBD" and 1 % among those without this condition (adjusted OR=0.94; 95 % CI=0.72-1.23; p=0.657). OR was 0.28 in individuals aged  $\leq 65$  years (95 % CI=0.10-0.74; p=0.01) and 1.17 in older individuals (95 % CI=0.89-1.54; p=0.257).

**Conclusions:** Within the limitations of this study, the results suggest a protective role for IBD and/or 5-ASA against PD development, especially among under 65-year-olds. Further studies are warranted to explore this association given its scientific and therapeutic implications.

### **Strengths and limitations of this study**

- This is the first study that analyzes the association between aminosalicilate-treated inflammatory bowel disease and Parkinson's disease at population level.
- We conducted this study with a large population-based sample.
- The study was performed based on electronic drug prescription and dispensation records of the Andalusian Public Health System, Spain.
- This study has limitations related to the utilization of a drug dispensation record, and there is also a potential classification error related to the selection of proxy variables.

## Introduction

Parkinson's disease (PD) is a multisystemic process with early involvement of the peripheral autonomic nervous system and subsequent propagation to the central nervous system [1]. After reports of deposits of alpha-synuclein aggregates that form neurites or Lewy bodies in gastric submucosal and myenteric plexi [1], various clinical and experimental studies described the enteric nervous system as fundamental in the etiopathogenesis of PD [1-5]. Braak's "dual-hit" hypothesis has been endorsed by evidence of the centripetal trans-synaptic and axonal migration of alpha-synuclein aggregates from neurons of the digestive system to brainstem structures such as the dorsal nucleus of the vagus nerve (Braak stage 2) [1-3]. It has been reported that certain components of the microbiota of PD patients can produce rupture of the intestinal barrier and bacterial translocation, which may be responsible for an intestinal proinflammatory status and subsequent alpha-synuclein aggregation and propagation [6,7].

Some features of inflammatory bowel disease (IBD) are similar to those of PD. Thus, their etiopathogenesis involves an anomalous immune response to specific microbiota that would trigger intestinal inflammatory activity in predisposed individuals unable to inhibit this inflammation and without the immunological tolerance characteristic of a healthy intestine [8]. The few studies on the relationship between these diseases have published controversial results, with observations either of no association [9] or of an increased risk of PD only among patients with Crohn's disease [10], attributable to a genetic relationship between these diseases at different *loci*, as revealed in a genome-wide association study [11]. Specifically, mutations in the leucine-rich repeat kinase 2 (LRRK2) gene, recently associated with Crohn's disease, have revealed pleiotropy between this IBD and PD risk [12]. Instead, a meta-analysis of the recent literature

1  
2  
3 showed an increased risk of PD in the IBD population and the increased risk remained  
4  
5 significant when analyzing Crohn's disease and ulcerous colitis subgroups [13].  
6

7  
8 With this background, the objective of this study was to explore associations between  
9  
10 PD and IBD treated with mesalazine (5-aminosalicylic acid) or its derivative  
11  
12 sulfasalazine, hereafter 5-ASA, because they could have a role in reducing the risk of  
13  
14 PD.  
15  
16  
17  
18  
19  
20  
21  
22  
23  
24  
25  
26  
27  
28  
29  
30  
31  
32  
33  
34  
35  
36  
37  
38  
39  
40  
41  
42  
43  
44  
45  
46  
47  
48  
49  
50  
51  
52  
53  
54  
55  
56  
57  
58  
59  
60

For peer review only

## Material and methods

A cross-sectional study was performed based on electronic drug prescription and dispensation records (*Receta XXI*) of the Andalusian Public Health System, which include 98 % of all prescriptions in the region. Andalusia is located in southern Spain and is the most populated autonomous community in the country, with 8,402,000 inhabitants. The study was approved by the Research Ethics Committee of Granada (CEI-GRANADA).

### *Subjects*

All individuals aged  $\geq 50$  yrs with at least one drug dispensation during December 2014 were identified from the records. Three groups were formed: “Possible PD” group, including all who received an anti-Parkinson agent, such as levodopa in different formulations and/or dopaminergic agonist, excluding those only receiving a single low-dose dopaminergic agonist (ropinirole  $\leq 1$  mg; rotigotine  $\leq 2$  mg; pramipexole  $\leq 0.26$  mg; pergolide  $\leq 1$  mg; cabergoline  $\leq 1$  mg) and/or monoamine oxidase B inhibitor, including those exclusively treated with selegiline or rasagiline; “Possible IBD” group, including all receiving 5-ASA in its different formulations (mesalazine/mesalamine or 5-aminosalicylic acid and sulfasalazine); and “Possible PD and IBD”, including those receiving both anti-Parkinson agent and 5-ASA.

### *Study variables*

Membership of the “Possible PD” group was the dependent variable, and membership of the “Possible IBD” group, sex, and age were the predictive variables.

### *Data gathering*

Data were obtained from the computerized databases of the Andalusian Health Service Pharmacy and Benefit Support Department. Anonymity was preserved by masking clinical record numbers.

### ***Data analysis***

In a descriptive analysis, central tendency and dispersion measurements were calculated for quantitative variables and absolute and relative frequencies for qualitative variables, plotting the corresponding graphs. After applying the Kolmogorov-Smirnov test to check data distribution normality, between-group comparisons were evaluated with the Mann-Whitney U for the quantitative variable (age) and with the chi-square test for categorical variables. After controlling for age and sex, the strength of between-group associations was established by constructing a multiple logistic regression model to estimate the odds ratio (OR) and 95 % confidence interval. All tests were two-tailed, and  $p < 0.05$  was considered significant. R and SPSS 21 statistical packages were used for the statistical analysis.

### ***Patient and Public Involvement***

Patients were not involved.

## Results

During December 2014, 2,020,868 individuals aged  $\geq 50$  yrs were dispensed with at least one drug; their mean age was  $67.9 \pm 11.8$  yrs., 56 % were female (mean of  $68.6 \pm 11.5$  yrs) and 44 % were male (mean of  $67.2 \pm 10.7$  yrs.). The study included 27,451 patients (mean age of  $72.3 \pm 10.9$  yrs.; 51 % female) with at least one dispensation of anti-Parkinson agent ("Possible PD") and/or 5-ASA ("Possible IBD") after excluding 24 patients with inadequate records (e.g., missing data on age and/or sex) and 6 with unlikely PD (low-dose dopaminergic agonist [0.5 mg cabergoline in 1 case and 0.5 mg ropinirole in 5]); the mean age was slightly higher for the females than for the males ( $73.1 \pm 10.9$  vs.  $71.4 \pm 10.8$  yrs.;  $p=0.0001$ )

A total of 19,966 individuals were considered as "Possible PD" (mean age of  $75.4 \pm 9.3$  yrs.; 53 % females) and 7,485 as "Possible IBD" ( $64.15 \pm 10.4$  yrs.; 47 % females).

Individuals with "Possible PD" were older ( $p=0.0001$ ) and more frequently female ( $p=0.0001$ ) in comparison to those with "Possible IBD" (figure 1). A group of 56 individuals (32 females) were considered both "Possible PD" and "Possible IBD; their mean age was  $75.7 \pm 8.1$  yrs (range, 52-94 yrs), and they showed no differences in age ( $p=0.956$ ) or sex ( $p=0.505$ ) distribution with respect to the "Possible PD" group.

The prevalence of "Possible PD" was 0.7 % in the "Possible IBD" group and 1 % in those without this condition (Table 1). "Possible IBD" showed a reduced risk for "Possible PD" with OR of 0.75 (95 % CI=0.57-0.98;  $p=0.036$ ), rising to 0.94 (95 % CI=0.72-1.23;  $p=0.657$ ) after controlling for age and sex; stratification by age yielded an OR of 0.28 (95 % CI=0.10-0.74;  $p=0.01$ ) for individuals aged  $\leq 65$  years and 1.17 (95 % CI =0.89-1.54;  $p=0.257$ ) for those aged  $> 65$  years, after controlling for sex (Table 2).



## Discussion

The results of this cross-sectional study suggest that the presence of IBD and/or treatment with 5-ASA may play a protective role against PD development, especially among under-65-year-olds. The pathogenesis of the two diseases may share certain features, including the role of enteric glial cells [14-16] and inflammation [17], genetic factors (PD and Crohn's disease) [11], the protective effect of tobacco (PD and ulcerous colitis) [18], the presence of proinflammatory flora, and altered permeability with rupture of the intestinal barrier [6,7]. In fact, the inflammatory condition and/or treatment with 5-ASA might have been expected to act as a risk rather than protective factor, unless they have some impact on the pathogenesis of this synucleinopathy. Our results are similar to those of the recent case-control study of PD risk based on Medicare data; this group found an inverse association between IBD and PD, including both Crohn's disease and ulcerous colitis. Similarly, there was an inverse association between PD and IBD-associated conditions, as well as IBD associated surgical procedures and immunosuppressant use, even among beneficiaries without IBD. The authors suggest that IBD is associated with a lower risk of developing PD in the adjusted model for a population aged > 65 years (OR = 0.86; 95% CI=0.81-0.92) [19]. Conversely, a retrospective cohort study based on healthcare records found an increased risk of PD among IBD patients, especially those with Crohn's disease, given that this association was not observed in the subgroup with ulcerous colitis (OR = 0.94; 95 % CI=0.49-1.84) [10]. Although these cases were not specified in our study, they can largely be considered to have ulcerous colitis, given reservations in clinical guidelines about the administration of 5-ASA in Crohn's disease [20]. In the aforementioned cohort study, there was a relative reduction in PD risk among patients with longer

1  
2  
3 follow-up times, similar to observations in individuals with truncal vagotomy [21,22]  
4  
5 and in under 65year-olds, as in the present study.  
6

7  
8 Recently three studies have been published describing a risk association between IBD  
9  
10 and PD. In the Danish nationwide population cohort study, covering the period 1977-  
11  
12 2014, found a significantly increased risk of PD when comparing patients with IBD  
13  
14 with non-IBD (HR=1.22; 95% CI=1.09-1.35), especially among patients with ulcerative  
15  
16 colitis (HR=1.35; 95% CI=1.20-1.52). However, in those patients diagnosed with IBD  
17  
18 under 40 years of age and with prolonged follow-up > 20 years, this increase was not  
19  
20 statistically significant [23], suggesting, as we have previously referred, that IBD  
21  
22 treatment may lessen the risk of PD. In a similar way, a Nationwide Swedish Cohort  
23  
24 Study, covering the period 2002-2014, found that IBD is associated with an increased  
25  
26 risk of PD, however IBD patients who developed PD were much older at the end of  
27  
28 follow-up (88% vs 35% at age  $\geq 60$  years;  $p=0.001$ ) and more likely to never have  
29  
30 received thiopurine or anti-TNF compared with those without PD (88% vs 66%;  $p=$   
31  
32 0.001), 80% of PD events occurred in patients with IBD onset  $\geq 60$  years and the relative  
33  
34 risk of future PD in IBD was highest among patients diagnosed with IBD at age 60  
35  
36 years or older. Authors suggested a potential protective effect of selective IBD-directed  
37  
38 therapies, thiopurines, or anti-TNF- $\alpha$  on PD, as IBD patients never exposed to  
39  
40 thiopurines or anti-TNF were 60% more likely to develop PD (HR, 1.6;95% CI, 1.2–  
41  
42 2.2) than their matched reference individuals [24], raising again the protective effect of  
43  
44 the treatment of IBD on the development of PD. In a retrospective cohort study, based  
45  
46 on the Market-Scan Commercial and Medicare databases, a higher incidence of PD was  
47  
48 observed among patients with IBD than among individuals without IBD; the authors  
49  
50 found a statistically significant 28% increase in the incidence of PD among patients  
51  
52 with IBD compared with the unaffected matched controls. Conversely, they observed a  
53  
54  
55  
56  
57  
58  
59  
60

1  
2  
3 markedly lower PD incidence rate (0.08 per 1000 patient-years) among patients with  
4 IBD who were exposed to anti-TNF therapy compared with patients without exposure  
5 (0.76 per 1000 patient-years), which means a 78% reduction in the PD incidence rate  
6 [25], a risk reduction in the same range as that found in our patients treated with 5-ASA.  
7  
8 Despite the contradictory associations between both processes, two studies find a  
9  
10 reduction in the risk of PD related to the use of immunomodulators [19,25], although  
11  
12 they do not describe the degree of exposure to 5-ASA. It is presumable that those with a  
13  
14 more active disease and therefore candidates for immunomodulators therapies will have  
15  
16 had a greater exposure to 5-ASA, but it is also possible that those treated exclusively  
17  
18 with 5-ASA have a more benign inflammatory disease.  
19  
20

21  
22 5-ASA drugs are the first-line treatment in ulcerous colitis [20,26]. Their action  
23  
24 mechanism is not fully elucidated but is considered to include: a) anti-inflammatory  
25  
26 activity or inhibition of the local synthesis of prostaglandins and leukotrienes [27]; b)  
27  
28 reduction in nitric oxide and IL-6 production and an antiapoptotic effect, diminishing  
29  
30 phosphorylation by mitogen-activated protein kinases (MAPKs), e.g., p38 and JNK (c-  
31  
32 Jun N-terminal kinases) [28]; and c) action on the microbiota, producing qualitative and  
33  
34 quantitative changes in its composition [29].  
35  
36

37  
38 In PD, alpha-synuclein aggregates are known to be present in the intestine some years  
39  
40 before the onset of motor symptoms [4,5], especially in certain structures such as the  
41  
42 vermiform appendix [30]. Local action mechanisms of 5-ASA described above may  
43  
44 affect progression of the synucleinopathy, given that they may act on etiopathogenetic  
45  
46 mechanisms that would activate microglia, associated with certain microbiota and  
47  
48 bacterial membrane lipopolysaccharides or endogenous factors (e.g., JNK and p38) [31-  
49  
50  
51  
52  
53  
54  
55  
56  
57  
58  
59  
60  
33].

1  
2  
3 In a recent murine model with alpha-synuclein overexpression, transplantation from PD  
4 patients of fecal matter with greater short-chain fatty-acid content was followed by  
5  
6 microglial activation, an increase in inflammation mediators (TNF- $\alpha$  and IL-6) and in  
7  
8 alpha-synuclein aggregation and propagation, a poorer execution of motor tests, and  
9  
10 even constipation; these changes were reduced by treatment with minocycline [34],  
11  
12 suggesting that other drug groups, such as 5-ASA, may have a similar effect.  
13  
14

15  
16 This study has limitations related to the utilization of a drug dispensation record,  
17  
18 subjects therefore not be considered representative of the general population. The  
19  
20 resulting ORs may be overestimated, because the prevalence of both diseases was over-  
21  
22 represented but in an unequal manner, being higher for PD in the study population than  
23  
24 in the general population and only slightly higher for IBD. Cross-sectional drug  
25  
26 dispensation studies are more likely to include patients with PD than with IBD due to  
27  
28 their older age and more frequent polymedication and because some biological and  
29  
30 immunosuppressive therapies received by IBD patients in the hospital are not included  
31  
32 in the dispensary records. Furthermore, individuals treated with 5-ASA are a subgroup  
33  
34 of patients with IBD and ulcerous colitis, mainly in those with active disease. We did  
35  
36 not control for the possibility of a group of patients receiving combined maintenance  
37  
38 therapy (5-ASA and other drugs). There is also a potential classification error related to  
39  
40 the selection of *proxy* variables, given that the diseases under study were identified  
41  
42 according to the medication received. Notably, dopaminergic drugs are prescribed,  
43  
44 although much less frequently, for diseases other than PD (atypical parkinsonism,  
45  
46 chronic adult hydrocephaly, restless legs syndrome, etc.); however, this is unlikely to  
47  
48 have affected the validity of our results given the large sample size.  
49  
50  
51  
52  
53  
54  
55  
56  
57  
58  
59  
60

## Conclusions

A lower risk of PD was observed in individuals with IBD aged  $\leq 65$  years and treated with 5-ASA, which may be, as hypothesis, related to a theoretical pharmacological effect on alpha-synuclein aggregation and propagation that could reduce or delay PD onset in at-risk populations. The advantages of 5-ASA medication include its relatively low cost and lack of absorption. Within the limitations of the methodology applied, further experimental research with animal models and new longitudinal studies are warranted, given the important scientific and therapeutic implications of these findings.

**Acknowledgments:** None

**Funding statement:** This research received no specific grant from any funding agency in the public, commercial or not-for-profit sectors.

**Conflict of interest:** The authors declare they have no conflict of interest.

**Author Contributions:** JP, FE and VC contributed conception and design of the study; MPN, MPV and CM organized the database; FE and AM performed the statistical analysis; JP wrote the first draft of the manuscript; FE, CM, MC and MG wrote sections of the manuscript. All authors contributed to manuscript revision, read and approved the submitted version.

**Data sharing statement:** No additional data are available.

## References

1. Braak H, Rüb U, Gai WP, Del Tredici K. Idiopathic Parkinson's disease: possible routes by which vulnerable neuronal types may be subject to neuroinvasion by an unknown pathogen. *J Neural Transm* 2003; 110: 517–36.
2. Pan-Montojo F, Anichtchik O, Dening Y, et al. Progression of Parkinson's disease pathology is reproduced by intragastric administration of rotenone in mice. *PLoS ONE* 2010; 5: e8762.
3. Holmqvist S, Chutna O, Bousset L, et al. Direct evidence of Parkinson pathology spread from the gastrointestinal tract to the brain in rats. *Acta Neuropathol* 2014; 128: 805–20.
4. Hilton D, Stephens M, Kirk L, et al. Accumulation of  $\alpha$ -synuclein in the bowel of patients in the pre-clinical phase of Parkinson's disease. *Acta Neuropathol* 2013; 127: 235–41.
5. Mínguez-Castellanos A, Chamorro CE, Escamilla-Sevilla F, et al. Do alpha-synuclein aggregates in autonomic plexuses predate Lewy body disorders?: a cohort study. *Neurology* 2007; 68: 2012–8.
6. Kelly LP, Carvey PM, Keshavarzian A, et al. Progression of intestinal permeability changes and alpha-synuclein expression in a mouse model of Parkinson's disease. *Mov Disord* 2013; 29: 999–1009.
7. Forsyth CB, Shannon KM, Kordower JH, et al. Increased intestinal permeability correlates with sigmoid mucosa alpha-synuclein staining and endotoxin exposure markers in early Parkinson's Disease. *PLoS ONE* 2011; 6: e28032–10.
8. Sheehan D, Moran C, Shanahan F. The microbiota in inflammatory bowel disease. *J Gastroenterol* 2015; 50 (5): 495-507.

- 1  
2  
3 9. Rughjerg K, Friis S, Ritz B, Schernhammer ES, Korbo L, Olsen JH.  
4  
5 Autoimmune disease and risk for Parkinson disease: a population-based case-  
6  
7 control study. *Neurology* 2009; 73: 1462–8.  
8  
9
- 10 10. Lin JC, Lin CS, Hsu CW, Lin CL, Kao CH. Association Between Parkinson's  
11  
12 Disease and Inflammatory Bowel Disease: a Nationwide Taiwanese  
13  
14 Retrospective Cohort Study. *Inflamm Bowel Dis* 2016; 22(5): 1049-55.  
15  
16
- 17 11. Nalls MA, Saad M, Noyce AJ, et al. Genetic comorbidities in Parkinson's  
18  
19 disease. *Hum Mol Genet* 2014; 23: 831–41.  
20  
21
- 22 12. Hui KY, Fernandez-Hernandez H, Hu J, et al. Functional variants in the *LRRK2*  
23  
24 gene confer shared effects on risk for Crohn's disease and Parkinson's disease.  
25  
26 *Sci Transl Med* 2018; 10 (423).  
27  
28
- 29 13. Zhu F, Li C, Gong J, Zhu W, Gu L, Li N. The risk of Parkinson's disease in  
30  
31 inflammatory bowel disease: A systematic review and meta-analysis. *Dig Liver*  
32  
33 *Dis* 2019; 51: 38–42.  
34  
35
- 36 14. Clairembault T, Leclair-Visonneau L, Neunlist M, Derkinderen P. Enteric glial  
37  
38 cells: New players in Parkinson's disease? *Mov Disord* 2015; 30(4):494-8.  
39  
40
- 41 15. Ochoa-Cortes F, Turco F, Linan-Rico A, et al. Enteric Glial Cells: A New  
42  
43 Frontier in Neurogastroenterology and Clinical Target for Inflammatory Bowel  
44  
45 Diseases. *Inflamm Bowel Dis* 2016; 22(2): 433-49.  
46  
47
- 48 16. Capoccia E, Cirillo C, Gigli S, et al. Enteric glia: A new player in inflammatory  
49  
50 bowel diseases. *Int J Immunopathol Pharmacol.* 2015; 28(4): 443-51.  
51  
52
- 53 17. Devos D, Lebouvier T, Lardeux B, et al. Colonic inflammation in Parkinson's  
54  
55 disease. *Neurobiol Dis* 2013; 50: 42–8.  
56  
57
- 58 18. Derkinderen P, Shannon KM, Brundin P. Gut feelings about smoking and coffee  
59  
60 in Parkinson's disease. *Mov Disord* 2014; 29: 976–9.

- 1  
2  
3 19. Camacho-Soto A, Gross A, Nielsen S.S. et al, Inflammatory bowel disease and  
4 risk of Parkinson's disease in Medicare beneficiaries. *Parkinsonism Relat Disord*  
5 2018; 50:23–28.  
6  
7
- 8  
9  
10 20. Mowat C, Cole A, Windsor A, et al. Guidelines for the management of  
11 inflammatory bowel disease in adults. *Gut* 2011; 60: 571-607.  
12  
13
- 14 21. Liu B, Fang F, Pedersen NL, et al. Vagotomy and Parkinson disease: A Swedish  
15 register-based matched-cohort study. *Neurology* 2017; 88(21): 1996-2002.  
16  
17
- 18 22. Svensson E, Horváth-Puhó E, Thomsen RW, et al. Vagotomy and subsequent  
19 risk of Parkinson's disease. *Ann Neurol* 2015; 78(4): 522-9.  
20  
21
- 22 23. Villumsen M, Aznar S, Pakkenberg B, et al. Inflammatory bowel disease  
23 increases the risk of Parkinson's disease: a Danish nationwide cohort  
24 study 1977–2014. *Gut* 2018; 0:1–7.  
25  
26
- 27 24. Weimers P, Halfvarson J, Sachs MC, et al. Inflammatory Bowel Disease and  
28 Parkinson's Disease: A Nationwide Swedish Cohort Study. *Inflamm Bowel Dis*  
29 2019 Jan 1;25(1):111-123.  
30  
31
- 32 25. Peter I, Dubinsky M, Bressman S, et al. Anti-tumor necrosis factor therapy and  
33 incidence of Parkinson disease among patients with inflammatory bowel  
34 disease. *JAMA Neurol* 2018; 75: 939–46.  
35  
36
- 37 26. Ford AC, Achkar JP, Khan KJ, et al. Efficacy of 5-aminosalicylates in ulcerative  
38 colitis: systematic review and meta-analysis. *Am J Gastroenterol* 2011; 106:601.  
39  
40
- 41 27. Greenfield SM, Pouchard NA, Teare JP. et al. Review article: The mode of  
42 action of the aminosalicylates in inflammatory bowel disease. *Aliment*  
43 *Pharmacol Ther* 1993; 7: 369-383.  
44  
45  
46  
47  
48  
49  
50  
51  
52  
53  
54  
55  
56  
57  
58  
59  
60



- 1  
2  
3 28. Qu T, Wang E, Jin B, Li W, Liu R, Zhao ZB. 5-Aminosalicylic acid inhibits  
4  
5 inflammatory responses by suppressing JNK and p38 activity in murine  
6  
7 macrophages. *Immunopharmacol Immunotoxicol* 2017; 39(1): 45-53.  
8  
9
- 10 29. Andrews CN, Griffiths TA, Kaufman J, Vergnolle N, Surette MG, Rioux KP.  
11  
12 Mesalazine (5-aminosalicylic acid) alters faecal bacterial profiles, but not  
13  
14 mucosal proteolytic activity in diarrhoea-predominant irritable bowel syndrome.  
15  
16 *Aliment Pharmacol Ther* 2011; 34(3): 374-83.  
17  
18
- 19 30. Gray MT, Munoz DG, Gray DA, Schlossmacher MG, Woulfe JM. Alpha-  
20  
21 synuclein in the appendiceal mucosa of neurologically intact subjects. *Mov*  
22  
23 *Disord* 2013; 29: 991-8.  
24  
25
- 26 31. Zhang W, Gao JH, Yan ZF, et al. Minimally toxic dose of lipopolysaccharide  
27  
28 and  $\alpha$ -synuclein oligomer elicit synergistic dopaminergic neurodegeneration:  
29  
30 role and mechanism of microglial NOX2 activation. *Mol Neurobiol*. 2016 Dec  
31  
32 15. [Epub ahead of print].  
33  
34
- 35 32. Moussaud S, Malany S, Mehta A, Vasile S, Smith LH, McLean PJ. Targeting  $\alpha$ -  
36  
37 synuclein oligomers by protein-fragment complementation for drug discovery in  
38  
39 synucleinopathies. *Expert Opin Ther Targets* 2015; 19(5): 589-603.  
40  
41
- 42 33. Wilms H, Rosenstiel P, Romero-Ramos M, et al. Suppression of MAP kinases  
43  
44 inhibits microglial activation and attenuates neuronal cell death induced by  
45  
46 alpha-synuclein protofibrils. *Int J Immunopathol Pharmacol* 2009; 22(4):897-  
47  
48 909.  
49  
50
- 51 34. Sampson TR, Debelius JW, Thron T, et al. Gut Microbiota Regulate Motor  
52  
53 Deficits and Neuroinflammation in a Model of Parkinson's Disease. *Cell* 2016;  
54  
55 167(6):1469-1480.  
56  
57  
58  
59  
60

## Figures

Figure 1. Population pyramid with age and sex distribution of the groups with possible inflammatory bowel disease (IBD) and possible Parkinson's disease (PD)

## Tables

**Table 1.** 2x2 contingency table and prevalence of possible PD

|                             | <b>Without Possible PD</b> | <b>With Possible PD</b> | <b>Prevalence Possible PD</b> |
|-----------------------------|----------------------------|-------------------------|-------------------------------|
| <b>Without Possible IBD</b> | 1993473                    | 19966                   | 1%                            |
| <b>With Possible IBD</b>    | 7485                       | 56                      | 0.7%                          |

**Table 2.** Age and sex adjusted risk of possible Parkinson's disease in individuals with possible inflammatory bowel disease

| <b>Variable</b> |                              | <b><math>\beta_1</math></b> | <b>OR (95 % CI)</b> | <b>p</b>      |
|-----------------|------------------------------|-----------------------------|---------------------|---------------|
| "Possible PD"   |                              | -0.28                       | 0.75 (0.57-0.98)    | <b>0.0362</b> |
| Adjusted model  | "Possible PD"                | -0.06                       | 0.94 (0.72-1.23)    | 0.657         |
|                 | "Possible PD" $\leq$ 65 yrs. | -1.28                       | 0.28 (0.10-0.74)    | <b>0.0103</b> |
|                 | "Possible PD" $>$ 65 yrs.    | 0.16                        | 1.17 (0.89-1.54)    | 0.257         |

Figure 1



Figure 1. Population pyramid with age and sex distribution of the groups with possible inflammatory bowel disease (IBD) and possible Parkinson's disease (PD)

# Reporting checklist for cross sectional study.

Based on the STROBE cross sectional guidelines.

## Instructions to authors

Complete this checklist by entering the page numbers from your manuscript where readers will find each of the items listed below.

Your article may not currently address all the items on the checklist. Please modify your text to include the missing information. If you are certain that an item does not apply, please write "n/a" and provide a short explanation.

Upload your completed checklist as an extra file when you submit to a journal.

In your methods section, say that you used the STROBE cross sectional reporting guidelines, and cite them as:

von Elm E, Altman DG, Egger M, Pocock SJ, Gotsche PC, Vandembroucke JP. The Strengthening the Reporting of Observational Studies in Epidemiology (STROBE) Statement: guidelines for reporting observational studies.

|                        |     | Reporting Item                                                                                                                  | Page Number |
|------------------------|-----|---------------------------------------------------------------------------------------------------------------------------------|-------------|
| Title                  | #1a | Indicate the study's design with a commonly used term in the title or the abstract                                              | 1           |
| Abstract               | #1b | Provide in the abstract an informative and balanced summary of what was done and what was found                                 | 2           |
| Background / rationale | #2  | Explain the scientific background and rationale for the investigation being reported                                            | 4           |
| Objectives             | #3  | State specific objectives, including any prespecified hypotheses                                                                | 5           |
| Study design           | #4  | Present key elements of study design early in the paper                                                                         | 6,7         |
| Setting                | #5  | Describe the setting, locations, and relevant dates, including periods of recruitment, exposure, follow-up, and data collection | 6,7         |
| Eligibility criteria   | #6a | Give the eligibility criteria, and the sources and methods of selection of participants.                                        | 6,7         |

|    |                  |      |                                                                   |     |
|----|------------------|------|-------------------------------------------------------------------|-----|
| 1  |                  | #7   | Clearly define all outcomes, exposures, predictors, potential     | 6,7 |
| 2  |                  |      | confounders, and effect modifiers. Give diagnostic criteria, if   |     |
| 3  |                  |      | applicable                                                        |     |
| 4  |                  |      |                                                                   |     |
| 5  |                  |      |                                                                   |     |
| 6  | Data sources /   | #8   | For each variable of interest give sources of data and details of | 6,7 |
| 7  | measurement      |      | methods of assessment (measurement). Describe                     |     |
| 8  |                  |      | comparability of assessment methods if there is more than one     |     |
| 9  |                  |      | group. Give information separately for for exposed and            |     |
| 10 |                  |      | unexposed groups if applicable.                                   |     |
| 11 |                  |      |                                                                   |     |
| 12 |                  |      |                                                                   |     |
| 13 |                  |      |                                                                   |     |
| 14 | Bias             | #9   | Describe any efforts to address potential sources of bias         | 6,7 |
| 15 |                  |      |                                                                   |     |
| 16 |                  |      |                                                                   |     |
| 17 | Study size       | #10  | Explain how the study size was arrived at                         | 6,7 |
| 18 |                  |      |                                                                   |     |
| 19 | Quantitative     | #11  | Explain how quantitative variables were handled in the            | 6,7 |
| 20 | variables        |      | analyses. If applicable, describe which groupings were chosen,    |     |
| 21 |                  |      | and why                                                           |     |
| 22 |                  |      |                                                                   |     |
| 23 |                  |      |                                                                   |     |
| 24 | Statistical      | #12a | Describe all statistical methods, including those used to control | 6,7 |
| 25 | methods          |      | for confounding                                                   |     |
| 26 |                  |      |                                                                   |     |
| 27 |                  |      |                                                                   |     |
| 28 |                  | #12b | Describe any methods used to examine subgroups and                | 6,7 |
| 29 |                  |      | interactions                                                      |     |
| 30 |                  |      |                                                                   |     |
| 31 |                  |      |                                                                   |     |
| 32 |                  | #12c | Explain how missing data were addressed                           | 6,7 |
| 33 |                  |      |                                                                   |     |
| 34 |                  |      |                                                                   |     |
| 35 |                  | #12d | If applicable, describe analytical methods taking account of      | 6,7 |
| 36 |                  |      | sampling strategy                                                 |     |
| 37 |                  |      |                                                                   |     |
| 38 |                  |      |                                                                   |     |
| 39 |                  | #12e | Describe any sensitivity analyses                                 | 6,7 |
| 40 |                  |      |                                                                   |     |
| 41 | Participants     | #13a | Report numbers of individuals at each stage of study—eg           | 8   |
| 42 |                  |      | numbers potentially eligible, examined for eligibility, confirmed |     |
| 43 |                  |      | eligible, included in the study, completing follow-up, and        |     |
| 44 |                  |      | analysed. Give information separately for for exposed and         |     |
| 45 |                  |      | unexposed groups if applicable.                                   |     |
| 46 |                  |      |                                                                   |     |
| 47 |                  |      |                                                                   |     |
| 48 |                  |      |                                                                   |     |
| 49 |                  | #13b | Give reasons for non-participation at each stage                  | 8   |
| 50 |                  |      |                                                                   |     |
| 51 |                  |      |                                                                   |     |
| 52 |                  | #13c | Consider use of a flow diagram                                    | 8   |
| 53 |                  |      |                                                                   |     |
| 54 | Descriptive data | #14a | Give characteristics of study participants (eg demographic,       | 8   |
| 55 |                  |      | clinical, social) and information on exposures and potential      |     |
| 56 |                  |      | confounders. Give information separately for exposed and          |     |
| 57 |                  |      | unexposed groups if applicable.                                   |     |
| 58 |                  |      |                                                                   |     |
| 59 |                  |      |                                                                   |     |
| 60 |                  |      |                                                                   |     |

|    |                  |      |                                                                      |       |
|----|------------------|------|----------------------------------------------------------------------|-------|
| 1  |                  | #14b | Indicate number of participants with missing data for each           | 8     |
| 2  |                  |      | variable of interest                                                 |       |
| 3  |                  |      |                                                                      |       |
| 4  |                  |      |                                                                      |       |
| 5  | Outcome data     | #15  | Report numbers of outcome events or summary measures.                | 8     |
| 6  |                  |      | Give information separately for exposed and unexposed                |       |
| 7  |                  |      | groups if applicable.                                                |       |
| 8  |                  |      |                                                                      |       |
| 9  |                  |      |                                                                      |       |
| 10 | Main results     | #16a | Give unadjusted estimates and, if applicable, confounder-            | 8     |
| 11 |                  |      | adjusted estimates and their precision (eg, 95% confidence           |       |
| 12 |                  |      | interval). Make clear which confounders were adjusted for and        |       |
| 13 |                  |      | why they were included                                               |       |
| 14 |                  |      |                                                                      |       |
| 15 |                  |      |                                                                      |       |
| 16 |                  |      |                                                                      |       |
| 17 |                  | #16b | Report category boundaries when continuous variables were            | 8     |
| 18 |                  |      | categorized                                                          |       |
| 19 |                  |      |                                                                      |       |
| 20 |                  |      |                                                                      |       |
| 21 |                  | #16c | If relevant, consider translating estimates of relative risk into    | 8     |
| 22 |                  |      | absolute risk for a meaningful time period                           |       |
| 23 |                  |      |                                                                      |       |
| 24 | Other analyses   | #17  | Report other analyses done—e.g., analyses of subgroups and           | 8     |
| 25 |                  |      | interactions, and sensitivity analyses                               |       |
| 26 |                  |      |                                                                      |       |
| 27 |                  |      |                                                                      |       |
| 28 | Key results      | #18  | Summarise key results with reference to study objectives             | 9     |
| 29 |                  |      |                                                                      |       |
| 30 |                  |      |                                                                      |       |
| 31 | Limitations      | #19  | Discuss limitations of the study, taking into account sources of     | 11,12 |
| 32 |                  |      | potential bias or imprecision. Discuss both direction and            |       |
| 33 |                  |      | magnitude of any potential bias.                                     |       |
| 34 |                  |      |                                                                      |       |
| 35 |                  |      |                                                                      |       |
| 36 | Interpretation   | #20  | Give a cautious overall interpretation considering objectives,       | 9-11  |
| 37 |                  |      | limitations, multiplicity of analyses, results from similar studies, |       |
| 38 |                  |      | and other relevant evidence.                                         |       |
| 39 |                  |      |                                                                      |       |
| 40 |                  |      |                                                                      |       |
| 41 | Generalisability | #21  | Discuss the generalisability (external validity) of the study        | 12    |
| 42 |                  |      | results                                                              |       |
| 43 |                  |      |                                                                      |       |
| 44 |                  |      |                                                                      |       |
| 45 | Funding          | #22  | Give the source of funding and the role of the funders for the       | 13    |
| 46 |                  |      | present study and, if applicable, for the original study on which    |       |
| 47 |                  |      | the present article is based                                         |       |
| 48 |                  |      |                                                                      |       |
| 49 |                  |      |                                                                      |       |

50 The STROBE checklist is distributed under the terms of the Creative Commons Attribution License  
 51 CC-BY. This checklist was completed on 22. July 2018 using <http://www.goodreports.org/>, a tool  
 52 made by the [EQUATOR Network](#) in collaboration with [Penelope.ai](#)  
 53  
 54  
 55  
 56  
 57  
 58  
 59  
 60
